# Supplementary material for: Genome-Wide Screening of Genes Regulated by DNA Methylation in Colon Cancer Development
Source: PubMed Central journal article supplement (PMC3462205; doi:10.1371/journal.pone.0046215), 2012-10-01
Supplement: pone.0046215.s005.pdf [file pone.0046215.s005.pdf]

## Supplementary Table 1

### Downregulated transcripts in tumor compared to normal epithelial cells

| Probe Set ID | Gene Symbol                                          | Gene Title                                                                                                                                                                                                                                                                                                                            |
|--------------|------------------------------------------------------|---------------------------------------------------------------------------------------------------------------------------------------------------------------------------------------------------------------------------------------------------------------------------------------------------------------------------------------|
| 213353_at    | ABCA5                                                | ATP-binding cassette, sub-family A (ABC1), member 5                                                                                                                                                                                                                                                                                   |
| 242553_at    | ABCC3                                                | ATP-binding cassette, sub-family C (CFTR/MRP), member 3                                                                                                                                                                                                                                                                               |
| 202850_at    | ABCD3                                                | ATP-binding cassette, sub-family D (ALD), member 3                                                                                                                                                                                                                                                                                    |
| 221927_s_at  | ABHD11                                               | abhydrolase domain containing 11                                                                                                                                                                                                                                                                                                      |
| 213017_at    | ABHD3                                                | abhydrolase domain containing 3                                                                                                                                                                                                                                                                                                       |
| 216929_x_at  | ABO                                                  | ABO blood group (transferase A, alpha 1-3-N-acetylgalactosaminyltransferase; transferase B, alpha 1-3-galactosyltransferase)                                                                                                                                                                                                          |
| 203559_s_at  | ABP1                                                 | amiloride binding protein 1 (amine oxidase (copper-containing))                                                                                                                                                                                                                                                                       |
| 214274_s_at  | ACAA1                                                | acetyl-CoA acyltransferase 1                                                                                                                                                                                                                                                                                                          |
| 49452_at     | ACACB                                                | acetyl-CoA carboxylase beta                                                                                                                                                                                                                                                                                                           |
| 202366_at    | ACADS                                                | acyl-CoA dehydrogenase, C-2 to C-3 short chain                                                                                                                                                                                                                                                                                        |
| 200710_at    | ACADVL                                               | acyl-CoA dehydrogenase, very long chain                                                                                                                                                                                                                                                                                               |
| 222688_at    | ACER3                                                | alkaline ceramidase 3                                                                                                                                                                                                                                                                                                                 |
| 214763_at    | ACOT11                                               | acyl-CoA thioesterase 11                                                                                                                                                                                                                                                                                                              |
| 228603_at    | ACTR3                                                | ARP3 actin-related protein 3 homolog (yeast)                                                                                                                                                                                                                                                                                          |
| 1563182_at   | ACVR1C                                               | activin A receptor, type IC                                                                                                                                                                                                                                                                                                           |
| 226950_at    | ACVRL1                                               | activin A receptor type II-like 1                                                                                                                                                                                                                                                                                                     |
| 205260_s_at  | ACYP1                                                | acylphosphatase 1, erythrocyte (common) type                                                                                                                                                                                                                                                                                          |
| 210377_at    | ACSM3                                                | acyl-CoA synthetase medium-chain family member 3                                                                                                                                                                                                                                                                                      |
| 234312_s_at  | ACSS2                                                | acyl-CoA synthetase short-chain family member 2                                                                                                                                                                                                                                                                                       |
| 206134_at    | ADAMDEC1                                             | ADAM-like, decysin 1                                                                                                                                                                                                                                                                                                                  |
| 203741_s_at  | ADCY7                                                | adenylate cyclase 7                                                                                                                                                                                                                                                                                                                   |
| 207820_at    | ADH1A                                                | alcohol dehydrogenase 1A (class I), alpha polypeptide                                                                                                                                                                                                                                                                                 |
| 206262_at    | ADH1C                                                | alcohol dehydrogenase 1C (class I), gamma polypeptide                                                                                                                                                                                                                                                                                 |
| 214261_s_at  | ADH6                                                 | alcohol dehydrogenase 6 (class V)                                                                                                                                                                                                                                                                                                     |
| 209869_at    | ADRA2A                                               | adrenergic, alpha-2A-, receptor                                                                                                                                                                                                                                                                                                       |
| 201924_at    | AFF1                                                 | AF4/FMR2 family, member 1                                                                                                                                                                                                                                                                                                             |
| 232865_at    | AFF4                                                 | AF4/FMR2 family, member 4                                                                                                                                                                                                                                                                                                             |
| 1552287_s_at | AFG3L1                                               | AFG3 ATPase family gene 3-like 1 (S. cerevisiae)                                                                                                                                                                                                                                                                                      |
| 1557820_at   | AFG3L2                                               | AFG3 ATPase family gene 3-like 2 (yeast)                                                                                                                                                                                                                                                                                              |
| 221971_x_at  | AGAP10 /// AGAP4<br>/// AGAP5 /// AGAP9              | ArfGAP with GTPase domain, ankyrin repeat and PH domain 10 ///<br>ArfGAP with GTPase domain, ankyrin repeat and PH domain 4 ///<br>ArfGAP with GTPase domain, ankyrin repeat and PH domain 5 ///<br>ArfGAP with GTPase domain, ankyrin repeat and PH domain 9                                                                         |
| 221850_x_at  | AGAP11 /// AGAP4<br>/// AGAP6 /// AGAP7<br>/// AGAP8 | ankyrin repeat and GTPase domain Arf GTPase activating protein 11<br>/// ArfGAP with GTPase domain, ankyrin repeat and PH domain 4 ///<br>ArfGAP with GTPase domain, ankyrin repeat and PH domain 6 ///<br>ArfGAP with GTPase domain, ankyrin repeat and PH domain 7 ///<br>ArfGAP with GTPase domain, ankyrin repeat and PH domain 8 |
| 203566_s_at  | AGL                                                  | amylo-alpha-1, 6-glucosidase, 4-alpha-glucanotransferase                                                                                                                                                                                                                                                                              |
| 224480_s_at  | AGPAT9                                               | 1-acylglycerol-3-phosphate O-acyltransferase 9                                                                                                                                                                                                                                                                                        |
| 225108_at    | AGPS                                                 | alkylglycerone phosphate synthase                                                                                                                                                                                                                                                                                                     |
| 228969_at    | AGR2                                                 | anterior gradient homolog 2 (Xenopus laevis)                                                                                                                                                                                                                                                                                          |
| 228241_at    | AGR3                                                 | anterior gradient homolog 3 (Xenopus laevis)                                                                                                                                                                                                                                                                                          |
| 205357_s_at  | AGTR1                                                | angiotensin II receptor, type 1                                                                                                                                                                                                                                                                                                       |
| 232488_at    | AGXT2L2                                              | alanine-glyoxylate aminotransferase 2-like 2                                                                                                                                                                                                                                                                                          |
| 212814_at    | AHCYL2                                               | adenosylhomocysteinase-like 2                                                                                                                                                                                                                                                                                                         |

|              |                                                                                                                                                     |                                                                                                                                                                                                                                                                                                                                                                                                                             |
|--------------|-----------------------------------------------------------------------------------------------------------------------------------------------------|-----------------------------------------------------------------------------------------------------------------------------------------------------------------------------------------------------------------------------------------------------------------------------------------------------------------------------------------------------------------------------------------------------------------------------|
| 221569_at    | AHI1                                                                                                                                                | Abelson helper integration site 1                                                                                                                                                                                                                                                                                                                                                                                           |
| 211986_at    | AHNAK                                                                                                                                               | AHNAK nucleoprotein                                                                                                                                                                                                                                                                                                                                                                                                         |
| 244084_at    | AIFM3                                                                                                                                               | apoptosis-inducing factor, mitochondrion-associated, 3                                                                                                                                                                                                                                                                                                                                                                      |
| 202587_s_at  | AK1                                                                                                                                                 | adenylate kinase 1                                                                                                                                                                                                                                                                                                                                                                                                          |
| 212172_at    | AK2                                                                                                                                                 | adenylate kinase 2                                                                                                                                                                                                                                                                                                                                                                                                          |
| 236007_at    | AKAP10                                                                                                                                              | A kinase (PRKA) anchor protein 10                                                                                                                                                                                                                                                                                                                                                                                           |
| 222024_s_at  | AKAP13                                                                                                                                              | A kinase (PRKA) anchor protein 13                                                                                                                                                                                                                                                                                                                                                                                           |
| 230846_at    | AKAP5                                                                                                                                               | A kinase (PRKA) anchor protein 5                                                                                                                                                                                                                                                                                                                                                                                            |
| 205771_s_at  | AKAP7                                                                                                                                               | A kinase (PRKA) anchor protein 7                                                                                                                                                                                                                                                                                                                                                                                            |
| 215483_at    | AKAP9                                                                                                                                               | A kinase (PRKA) anchor protein (yotiao) 9                                                                                                                                                                                                                                                                                                                                                                                   |
| 206561_s_at  | AKR1B10                                                                                                                                             | aldo-keto reductase family 1, member B10 (aldose reductase)                                                                                                                                                                                                                                                                                                                                                                 |
| 204151_x_at  | AKR1C1                                                                                                                                              | aldo-keto reductase family 1, member C1 (dihydrodiol dehydrogenase 1; 20-alpha (3-alpha)-hydroxysteroid dehydrogenase)                                                                                                                                                                                                                                                                                                      |
| 209699_x_at  | AKR1C2                                                                                                                                              | aldo-keto reductase family 1, member C2 (dihydrodiol dehydrogenase 2; bile acid binding protein; 3-alpha hydroxysteroid dehydrogenase, type III)                                                                                                                                                                                                                                                                            |
| 214259_s_at  | AKR7A2                                                                                                                                              | aldo-keto reductase family 7, member A2 (aflatoxin aldehyde reductase)                                                                                                                                                                                                                                                                                                                                                      |
| 216381_x_at  | AKR7A3                                                                                                                                              | aldo-keto reductase family 7, member A3 (aflatoxin aldehyde reductase)                                                                                                                                                                                                                                                                                                                                                      |
| 212224_at    | ALDH1A1                                                                                                                                             | aldehyde dehydrogenase 1 family, member A1                                                                                                                                                                                                                                                                                                                                                                                  |
| 205208_at    | ALDH1L1                                                                                                                                             | aldehyde dehydrogenase 1 family, member L1                                                                                                                                                                                                                                                                                                                                                                                  |
| 221590_s_at  | ALDH6A1                                                                                                                                             | Aldehyde dehydrogenase 6 family, member A1                                                                                                                                                                                                                                                                                                                                                                                  |
| 214707_x_at  | ALMS1                                                                                                                                               | Alstrom syndrome 1                                                                                                                                                                                                                                                                                                                                                                                                          |
| 204294_at    | AMT                                                                                                                                                 | aminomethyltransferase                                                                                                                                                                                                                                                                                                                                                                                                      |
| 228023_x_at  | AMY2B /// RNPC3                                                                                                                                     | amylase, alpha 2B (pancreatic) /// RNA-binding region (RNP1, RRM) containing 3                                                                                                                                                                                                                                                                                                                                              |
| 224667_x_at  | ANAPC16                                                                                                                                             | anaphase promoting complex subunit 16                                                                                                                                                                                                                                                                                                                                                                                       |
| 205141_at    | ANG                                                                                                                                                 | angiogenin, ribonuclease, RNase A family, 5                                                                                                                                                                                                                                                                                                                                                                                 |
| 229457_at    | ANKHD1                                                                                                                                              | ankyrin repeat and KH domain containing 1                                                                                                                                                                                                                                                                                                                                                                                   |
| 216550_x_at  | ANKRD12                                                                                                                                             | ankyrin repeat domain 12                                                                                                                                                                                                                                                                                                                                                                                                    |
| 238851_at    | ANKRD13A                                                                                                                                            | ankyrin repeat domain 13A                                                                                                                                                                                                                                                                                                                                                                                                   |
| 1569607_s_at | ANKRD20A1 ///<br>ANKRD20A2 ///<br>ANKRD20A3 ///<br>ANKRD20A4 ///<br>ANKRD20A5 ///<br>C21orf81 ///<br>LOC100132733 ///<br>LOC284232 ///<br>LOC644339 | ankyrin repeat domain 20 family, member A1 /// ankyrin repeat domain 20 family, member A2 /// ankyrin repeat domain 20 family, member A3 /// ankyrin repeat domain 20 family, member A4 /// ankyrin repeat domain 20 family, member A5 /// ankyrin repeat domain 20 family, member A3 pseudogene /// similar to FLJ00310 protein /// ankyrin repeat domain 20 family, member A2 pseudogene /// similar to ANKRD20A2 protein |
| 214723_x_at  | ANKRD36                                                                                                                                             | ankyrin repeat domain 36                                                                                                                                                                                                                                                                                                                                                                                                    |
| 220940_at    | ANKRD36B                                                                                                                                            | ankyrin repeat domain 36B                                                                                                                                                                                                                                                                                                                                                                                                   |
| 230972_at    | ANKRD9                                                                                                                                              | ankyrin repeat domain 9                                                                                                                                                                                                                                                                                                                                                                                                     |
| 218910_at    | ANO10                                                                                                                                               | anoctamin 10                                                                                                                                                                                                                                                                                                                                                                                                                |
| 229313_at    | ANO5                                                                                                                                                | anoctamin 5                                                                                                                                                                                                                                                                                                                                                                                                                 |
| 202888_s_at  | ANPEP                                                                                                                                               | alanyl (membrane) aminopeptidase                                                                                                                                                                                                                                                                                                                                                                                            |
| 225524_at    | ANTXR2                                                                                                                                              | anthrax toxin receptor 2                                                                                                                                                                                                                                                                                                                                                                                                    |
| 208323_s_at  | ANXA13                                                                                                                                              | annexin A13                                                                                                                                                                                                                                                                                                                                                                                                                 |
| 225771_at    | AP1G1                                                                                                                                               | adaptor-related protein complex 1, gamma 1 subunit                                                                                                                                                                                                                                                                                                                                                                          |
| 231714_s_at  | AP4B1                                                                                                                                               | adaptor-related protein complex 4, beta 1 subunit                                                                                                                                                                                                                                                                                                                                                                           |
| 220023_at    | APOB48R                                                                                                                                             | apolipoprotein B48 receptor                                                                                                                                                                                                                                                                                                                                                                                                 |
| 205216_s_at  | APOH                                                                                                                                                | apolipoprotein H (beta-2-glycoprotein I)                                                                                                                                                                                                                                                                                                                                                                                    |
| 200602_at    | APP                                                                                                                                                 | amyloid beta (A4) precursor protein                                                                                                                                                                                                                                                                                                                                                                                         |

|             |           |                                                                                             |
|-------------|-----------|---------------------------------------------------------------------------------------------|
| 209047_at   | AQP1      | aquaporin 1 (Colton blood group)                                                            |
| 39248_at    | AQP3      | aquaporin 3 (Gill blood group)                                                              |
| 214102_at   | ARAP2     | ArfGAP with RhoGAP domain, ankyrin repeat and PH domain 2                                   |
| 232175_at   | ARF1      | ADP-ribosylation factor 1                                                                   |
| 201097_s_at | ARF4      | ADP-ribosylation factor 4                                                                   |
| 203312_x_at | ARF6      | ADP-ribosylation factor 6                                                                   |
| 241701_at   | ARHGAP21  | Rho GTPase activating protein 21                                                            |
| 205068_s_at | ARHGAP26  | Rho GTPase activating protein 26                                                            |
| 229648_at   | ARHGAP32  | Rho GTPase activating protein 32                                                            |
| 232567_at   | ARHGAP8   | Rho GTPase activating protein 8                                                             |
| 1570511_at  | ARHGEF10L | Rho guanine nucleotide exchange factor (GEF) 10-like                                        |
| 203263_s_at | ARHGEF9   | Cdc42 guanine nucleotide exchange factor (GEF) 9                                            |
| 201658_at   | ARL1      | ADP-ribosylation factor-like 1                                                              |
| 220468_at   | ARL14     | ADP-ribosylation factor-like 14                                                             |
| 236966_at   | ARMC8     | armadillo repeat containing 8                                                               |
| 222912_at   | ARRB1     | arrestin, beta 1                                                                            |
| 225283_at   | ARRDC4    | arrestin domain containing 4                                                                |
| 238878_at   | ARX       | aristaless related homeobox                                                                 |
| 213902_at   | ASAH1     | N-acylsphingosine amidohydrolase (acid ceramidase) 1                                        |
| 218857_s_at | ASRGL1    | asparaginase like 1                                                                         |
| 231825_x_at | ATF7IP    | activating transcription factor 7 interacting protein                                       |
| 225883_at   | ATG16L2   | ATG16 autophagy related 16-like 2 (S. cerevisiae)                                           |
| 213115_at   | ATG4A     | ATG4 autophagy related 4 homolog A (S. cerevisiae)                                          |
| 220920_at   | ATP10B    | ATPase, class V, type 10B                                                                   |
| 207522_s_at | ATP2A3    | ATPase, Ca <sup>++</sup> transporting, ubiquitous                                           |
| 215716_s_at | ATP2B1    | ATPase, Ca <sup>++</sup> transporting, plasma membrane 1                                    |
| 206043_s_at | ATP2C2    | ATPase, Ca <sup>++</sup> transporting, type 2C, member 2                                    |
| 208972_s_at | ATP5G1    | ATP synthase, H <sup>+</sup> transporting, mitochondrial F0 complex, subunit C1 (subunit 9) |
| 207335_x_at | ATP5I     | ATP synthase, H <sup>+</sup> transporting, mitochondrial F0 complex, subunit E              |
| 237400_at   | ATP5S     | ATP synthase, H <sup>+</sup> transporting, mitochondrial F0 complex, subunit s (factor B)   |
| 208898_at   | ATP6V1D   | ATPase, H <sup>+</sup> transporting, lysosomal 34kDa, V1 subunit D                          |
| 213106_at   | ATP8A1    | ATPase, aminophospholipid transporter (APLT), class I, type 8A, member 1                    |
| 214594_x_at | ATP8B1    | ATPase, aminophospholipid transporter, class I, type 8B, member 1                           |
| 214934_at   | ATP9B     | ATPase, class II, type 9B                                                                   |
| 218671_s_at | ATPIF1    | ATPase inhibitory factor 1                                                                  |
| 210205_at   | B3GALT4   | UDP-Gal:betaGlcNAc beta 1,3-galactosyltransferase, polypeptide 4                            |
| 1552834_at  | B3GNT6    | UDP-GlcNAc:betaGal beta-1,3-N-acetylglucosaminyltransferase 6 (core 3 synthase)             |
| 1555962_at  | B3GNT7    | UDP-GlcNAc:betaGal beta-1,3-N-acetylglucosaminyltransferase 7                               |
| 229909_at   | B4GALNT3  | beta-1,4-N-acetyl-galactosaminyl transferase 3                                              |
| 212876_at   | B4GALT4   | UDP-Gal:betaGlcNAc beta 1,4- galactosyltransferase, polypeptide 4                           |
| 202387_at   | BAG1      | BCL2-associated athanogene                                                                  |
| 214052_x_at | BAT2L2    | HLA-B associated transcript 2-like 2                                                        |
| 204032_at   | BCAR3     | breast cancer anti-estrogen resistance 3                                                    |
| 204378_at   | BCAS1     | breast carcinoma amplified sequence 1                                                       |
| 205263_at   | BCL10     | B-cell CLL/lymphoma 10                                                                      |
| 1559078_at  | BCL11A    | B-cell CLL/lymphoma 11A (zinc finger protein)                                               |
| 203685_at   | BCL2      | B-cell CLL/lymphoma 2                                                                       |
| 1555372_at  | BCL2L11   | BCL2-like 11 (apoptosis facilitator)                                                        |
| 221241_s_at | BCL2L14   | BCL2-like 14 (apoptosis facilitator)                                                        |

|             |                                                                               |                                                                                                                                                                                                                                      |
|-------------|-------------------------------------------------------------------------------|--------------------------------------------------------------------------------------------------------------------------------------------------------------------------------------------------------------------------------------|
| 236083_at   | BCL2L15                                                                       | BCL2-like 15                                                                                                                                                                                                                         |
| 218285_s_at | BDH2                                                                          | 3-hydroxybutyrate dehydrogenase, type 2                                                                                                                                                                                              |
| 205870_at   | BDKRB2                                                                        | bradykinin receptor B2                                                                                                                                                                                                               |
| 224227_s_at | BDP1                                                                          | B double prime 1, subunit of RNA polymerase III transcription initiation factor IIIB                                                                                                                                                 |
| 207432_at   | BEST2                                                                         | bestrophin 2                                                                                                                                                                                                                         |
| 1552296_at  | BEST4                                                                         | bestrophin 4                                                                                                                                                                                                                         |
| 229963_at   | BEX5                                                                          | brain expressed, X-linked 5                                                                                                                                                                                                          |
| 207655_s_at | BLNK                                                                          | B-cell linker                                                                                                                                                                                                                        |
| 202201_at   | BLVRB                                                                         | biliverdin reductase B (flavin reductase (NADPH))                                                                                                                                                                                    |
| 205289_at   | BMP2                                                                          | bone morphogenetic protein 2                                                                                                                                                                                                         |
| 219546_at   | BMP2K                                                                         | BMP2 inducible kinase                                                                                                                                                                                                                |
| 218024_at   | BRP44L                                                                        | brain protein 44-like                                                                                                                                                                                                                |
| 224943_at   | BTBD7                                                                         | BTB (POZ) domain containing 7                                                                                                                                                                                                        |
| 217207_s_at | BTNL3                                                                         | butyrophilin-like 3                                                                                                                                                                                                                  |
| 220421_at   | BTNL8                                                                         | butyrophilin-like 8                                                                                                                                                                                                                  |
| 225035_x_at | BTNL8 ///<br>LOC100288778 ///<br>WASH1 /// WASH2P<br>/// WASH3P ///<br>WASH7P | butyrophilin-like 8 /// similar to WAS protein family homolog 1 /// WAS protein family homolog 1 /// WAS protein family homolog 2 pseudogene /// WAS protein family homolog 3 pseudogene /// WAS protein family homolog 7 pseudogene |
| 226340_x_at | BTNL8 /// WASH1 ///<br>WASH2P ///<br>WASH3P ///<br>WASH7P                     | butyrophilin-like 8 /// WAS protein family homolog 1 /// WAS protein family homolog 2 pseudogene /// WAS protein family homolog 3 pseudogene /// WAS protein family homolog 7 pseudogene                                             |
| 202808_at   | C10orf26                                                                      | chromosome 10 open reading frame 26                                                                                                                                                                                                  |
| 225373_at   | C10orf54                                                                      | chromosome 10 open reading frame 54                                                                                                                                                                                                  |
| 227736_at   | C10orf99                                                                      | chromosome 10 open reading frame 99                                                                                                                                                                                                  |
| 219806_s_at | C11orf75                                                                      | chromosome 11 open reading frame 75                                                                                                                                                                                                  |
| 242469_at   | C11orf93                                                                      | Chromosome 11 open reading frame 93                                                                                                                                                                                                  |
| 222613_at   | C12orf4                                                                       | chromosome 12 open reading frame 4                                                                                                                                                                                                   |
| 224719_s_at | C12orf57                                                                      | chromosome 12 open reading frame 57                                                                                                                                                                                                  |
| 229520_s_at | C14orf118                                                                     | chromosome 14 open reading frame 118                                                                                                                                                                                                 |
| 223239_at   | C14orf129                                                                     | chromosome 14 open reading frame 129                                                                                                                                                                                                 |
| 219563_at   | C14orf139                                                                     | chromosome 14 open reading frame 139                                                                                                                                                                                                 |
| 232814_x_at | C14orf153                                                                     | Chromosome 14 open reading frame 153                                                                                                                                                                                                 |
| 218298_s_at | C14orf159                                                                     | chromosome 14 open reading frame 159                                                                                                                                                                                                 |
| 229054_at   | C14orf181                                                                     | chromosome 14 open reading frame 181                                                                                                                                                                                                 |
| 202279_at   | C14orf2                                                                       | chromosome 14 open reading frame 2                                                                                                                                                                                                   |
| 238647_at   | C14orf28                                                                      | chromosome 14 open reading frame 28                                                                                                                                                                                                  |
| 237654_at   | C14orf50                                                                      | chromosome 14 open reading frame 50                                                                                                                                                                                                  |
| 228558_at   | C14orf80                                                                      | chromosome 14 open reading frame 80                                                                                                                                                                                                  |
| 224804_s_at | C15orf17                                                                      | chromosome 15 open reading frame 17                                                                                                                                                                                                  |
| 242649_x_at | C15orf21                                                                      | Dresden prostate cancer 2                                                                                                                                                                                                            |
| 232094_at   | C15orf29                                                                      | chromosome 15 open reading frame 29                                                                                                                                                                                                  |
| 223484_at   | C15orf48                                                                      | chromosome 15 open reading frame 48                                                                                                                                                                                                  |
| 203173_s_at | C16orf62                                                                      | chromosome 16 open reading frame 62                                                                                                                                                                                                  |
| 205781_at   | C16orf7                                                                       | chromosome 16 open reading frame 7                                                                                                                                                                                                   |
| 238295_at   | C17orf42                                                                      | Chromosome 17 open reading frame 42                                                                                                                                                                                                  |
| 214696_at   | C17orf91                                                                      | chromosome 17 open reading frame 91                                                                                                                                                                                                  |
| 224493_x_at | C18orf45                                                                      | chromosome 18 open reading frame 45                                                                                                                                                                                                  |
| 223181_at   | C18orf55                                                                      | chromosome 18 open reading frame 55                                                                                                                                                                                                  |
| 222266_at   | C19orf2                                                                       | Chromosome 19 open reading frame 2                                                                                                                                                                                                   |

|              |                         |                                                                              |
|--------------|-------------------------|------------------------------------------------------------------------------|
| 223631_s_at  | C19orf33                | chromosome 19 open reading frame 33                                          |
| 230213_at    | C19orf43                | chromosome 19 open reading frame 43                                          |
| 232469_x_at  | C1orf191                | chromosome 1 open reading frame 191                                          |
| 223125_s_at  | C1orf21                 | chromosome 1 open reading frame 21                                           |
| 1554246_at   | C1orf210                | chromosome 1 open reading frame 210                                          |
| 209006_s_at  | C1orf63                 | chromosome 1 open reading frame 63                                           |
| 228004_at    | C20orf56                | chromosome 20 open reading frame 56                                          |
| 202217_at    | C21orf33                | chromosome 21 open reading frame 33                                          |
| 239208_s_at  | C21orf57                | Chromosome 21 open reading frame 57                                          |
| 1555231_a_at | C21orf88                | chromosome 21 open reading frame 88                                          |
| 36552_at     | C2CD3                   | C2 calcium-dependent domain containing 3                                     |
| 213143_at    | C2orf72                 | chromosome 2 open reading frame 72                                           |
| 228195_at    | C2orf88                 | chromosome 2 open reading frame 88                                           |
| 227867_at    | C2orf89                 | chromosome 2 open reading frame 89                                           |
| 242447_at    | C3orf70                 | chromosome 3 open reading frame 70                                           |
| 219450_at    | C4orf19                 | chromosome 4 open reading frame 19                                           |
| 224990_at    | C4orf34                 | chromosome 4 open reading frame 34                                           |
| 230424_at    | C5orf13                 | chromosome 5 open reading frame 13                                           |
| 224707_at    | C5orf32                 | chromosome 5 open reading frame 32                                           |
| 1560128_x_at | C5orf56                 | Chromosome 5 open reading frame 56                                           |
| 229070_at    | C6orf105                | chromosome 6 open reading frame 105                                          |
| 227456_s_at  | C6orf136                | chromosome 6 open reading frame 136                                          |
| 212913_at    | C6orf26                 | chromosome 6 open reading frame 26                                           |
| 202992_at    | C7                      | complement component 7                                                       |
| 229146_at    | C7orf31                 | chromosome 7 open reading frame 31                                           |
| 228600_x_at  | C7orf46                 | chromosome 7 open reading frame 46                                           |
| 224890_s_at  | C7orf59                 | chromosome 7 open reading frame 59                                           |
| 230903_s_at  | C8orf42                 | chromosome 8 open reading frame 42                                           |
| 225603_s_at  | C8orf83                 | chromosome 8 open reading frame 83                                           |
| 224458_at    | C9orf125                | chromosome 9 open reading frame 125                                          |
| 229964_at    | C9orf152                | chromosome 9 open reading frame 152                                          |
| 223697_x_at  | C9orf64                 | chromosome 9 open reading frame 64                                           |
| 205950_s_at  | CA1                     | carbonic anhydrase I                                                         |
| 215867_x_at  | CA12                    | carbonic anhydrase XII                                                       |
| 209301_at    | CA2                     | carbonic anhydrase II                                                        |
| 207504_at    | CA7                     | carbonic anhydrase VII                                                       |
| 214933_at    | CACNA1A                 | calcium channel, voltage-dependent, P/Q type, alpha 1A subunit               |
| 204811_s_at  | CACNA2D2                | calcium channel, voltage-dependent, alpha 2/delta subunit 2                  |
| 1559419_at   | CACNB2                  | calcium channel, voltage-dependent, beta 2 subunit                           |
| 34726_at     | CACNB3                  | calcium channel, voltage-dependent, beta 3 subunit                           |
| 210817_s_at  | CALCOCO2                | calcium binding and coiled-coil domain 2                                     |
| 211984_at    | CALM1                   | calmodulin 1 (phosphorylase kinase, delta)                                   |
| 64408_s_at   | CALML4                  | calmodulin-like 4                                                            |
| 214315_x_at  | CALR                    | calreticulin                                                                 |
| 238908_at    | CALU                    | Calumenin                                                                    |
| 235626_at    | CAMK1D                  | calcium/calmodulin-dependent protein kinase ID                               |
| 226959_at    | CAMK1D ///<br>LOC283070 | calcium/calmodulin-dependent protein kinase ID /// hypothetical<br>LOC283070 |
| 231793_s_at  | CAMK2D                  | calcium/calmodulin-dependent protein kinase II delta                         |
| 229163_at    | CAMK2N1                 | calcium/calmodulin-dependent protein kinase II inhibitor 1                   |
| 46323_at     | CANT1                   | calcium activated nucleotidase 1                                             |
| 234709_at    | CAPN13                  | calpain 13                                                                   |

|              |                       |                                                                                                                                    |
|--------------|-----------------------|------------------------------------------------------------------------------------------------------------------------------------|
| 208683_at    | CAPN2                 | calpain 2, (m/II) large subunit                                                                                                    |
| 226292_at    | CAPN5                 | calpain 5                                                                                                                          |
| 229030_at    | CAPN8                 | calpain 8                                                                                                                          |
| 210641_at    | CAPN9                 | calpain 9                                                                                                                          |
| 37012_at     | CAPZB                 | capping protein (actin filament) muscle Z-line, beta                                                                               |
| 1552701_a_at | CARD16                | caspase recruitment domain family, member 16                                                                                       |
| 1552703_s_at | CARD16 /// CASP1      | caspase recruitment domain family, member 16 /// caspase 1, apoptosis-related cysteine peptidase (interleukin 1, beta, convertase) |
| 224619_at    | CASC4                 | cancer susceptibility candidate 4                                                                                                  |
| 219342_at    | CASD1                 | CAS1 domain containing 1                                                                                                           |
| 206011_at    | CASP1                 | caspase 1, apoptosis-related cysteine peptidase (interleukin 1, beta, convertase)                                                  |
| 207181_s_at  | CASP7                 | caspase 7, apoptosis-related cysteine peptidase                                                                                    |
| 1561405_s_at | CATSPER2              | cation channel, sperm associated 2                                                                                                 |
| 238549_at    | CBFA2T2               | core-binding factor, runt domain, alpha subunit 2; translocated to, 2                                                              |
| 208056_s_at  | CBFA2T3               | core-binding factor, runt domain, alpha subunit 2; translocated to, 3                                                              |
| 244052_at    | CBR4                  | carbonyl reductase 4                                                                                                               |
| 225320_at    | CCDC109A              | coiled-coil domain containing 109A                                                                                                 |
| 1553542_at   | CCDC125               | coiled-coil domain containing 125                                                                                                  |
| 225017_at    | CCDC14                | coiled-coil domain containing 14                                                                                                   |
| 237475_x_at  | CCDC152               | coiled-coil domain containing 152                                                                                                  |
| 235095_at    | CCDC64B               | coiled-coil domain containing 64B                                                                                                  |
| 220180_at    | CCDC68                | coiled-coil domain containing 68                                                                                                   |
| 232489_at    | CCDC76                | coiled-coil domain containing 76                                                                                                   |
| 222809_x_at  | CCDC85C               | coiled-coil domain containing 85C                                                                                                  |
| 210390_s_at  | CCL14-CCL15 /// CCL15 | CCL14-CCL15 read-through transcript /// chemokine (C-C motif) ligand 15                                                            |
| 224027_at    | CCL28                 | chemokine (C-C motif) ligand 28                                                                                                    |
| 201743_at    | CD14                  | CD14 molecule                                                                                                                      |
| 219669_at    | CD177                 | CD177 molecule                                                                                                                     |
| 205789_at    | CD1D                  | CD1d molecule                                                                                                                      |
| 200983_x_at  | CD59                  | CD59 molecule, complement regulatory protein                                                                                       |
| 200663_at    | CD63                  | CD63 molecule                                                                                                                      |
| 208728_s_at  | CDC42                 | cell division cycle 42 (GTP binding protein, 25kDa)                                                                                |
| 214464_at    | CDC42BPA              | CDC42 binding protein kinase alpha (DMPK-like)                                                                                     |
| 227850_x_at  | CDC42EP5              | CDC42 effector protein (Rho GTPase binding) 5                                                                                      |
| 219796_s_at  | CDHR5                 | cadherin-related family member 5                                                                                                   |
| 203468_at    | CDK10                 | cyclin-dependent kinase 10                                                                                                         |
| 232266_x_at  | CDK13                 | Cyclin-dependent kinase 13                                                                                                         |
| 229468_at    | CDK3                  | cyclin-dependent kinase 3                                                                                                          |
| 235512_at    | CDKL1                 | cyclin-dependent kinase-like 1 (CDC2-related kinase)                                                                               |
| 236313_at    | CDKN2B                | cyclin-dependent kinase inhibitor 2B (p15, inhibits CDK4)                                                                          |
| 204159_at    | CDKN2C                | cyclin-dependent kinase inhibitor 2C (p18, inhibits CDK4)                                                                          |
| 205709_s_at  | CDS1                  | CDP-diacylglycerol synthase (phosphatidate cytidyltransferase) 1                                                                   |
| 206430_at    | CDX1                  | caudal type homeobox 1                                                                                                             |
| 206199_at    | CEACAM7               | carcinoembryonic antigen-related cell adhesion molecule 7                                                                          |
| 219036_at    | CEP70                 | centrosomal protein 70kDa                                                                                                          |
| 209667_at    | CES2                  | carboxylesterase 2 (intestine, liver)                                                                                              |
| 234008_s_at  | CES3                  | carboxylesterase 3                                                                                                                 |
| 205382_s_at  | CFD                   | complement factor D (adipsin)                                                                                                      |
| 239629_at    | CFLAR                 | CASP8 and FADD-like apoptosis regulator                                                                                            |
| 204605_at    | CGRRF1                | cell growth regulator with ring finger domain 1                                                                                    |

|             |                         |                                                                                                                                      |
|-------------|-------------------------|--------------------------------------------------------------------------------------------------------------------------------------|
| 224932_at   | CHCHD10                 | coiled-coil-helix-coiled-coil-helix domain containing 10                                                                             |
| 244443_at   | CHD2                    | Chromodomain helicase DNA binding protein 2                                                                                          |
| 208807_s_at | CHD3                    | chromodomain helicase DNA binding protein 3                                                                                          |
| 212616_at   | CHD9                    | chromodomain helicase DNA binding protein 9                                                                                          |
| 218803_at   | CHFR                    | checkpoint with forkhead and ring finger domains                                                                                     |
| 204697_s_at | CHGA                    | chromogranin A (parathyroid secretory protein 1)                                                                                     |
| 204260_at   | CHGB                    | chromogranin B (secretogranin 1)                                                                                                     |
| 210069_at   | CHKB-CPT1B ///<br>CPT1B | choline kinase-like, carnitine palmitoyltransferase 1B (muscle)<br>transcription unit /// carnitine palmitoyltransferase 1B (muscle) |
| 218571_s_at | CHMP4A                  | chromatin modifying protein 4A                                                                                                       |
| 214665_s_at | CHP                     | calcium binding protein P22                                                                                                          |
| 206149_at   | CHP2                    | calcineurin B homologous protein 2                                                                                                   |
| 221164_x_at | CHST5                   | carbohydrate (N-acetylglucosamine 6-O) sulfotransferase 5                                                                            |
| 200810_s_at | CIRBP                   | cold inducible RNA binding protein                                                                                                   |
| 225191_at   | CIRBP                   | cold inducible RNA binding protein                                                                                                   |
| 209357_at   | CITED2                  | Cbp/p300-interacting transactivator, with Glu/Asp-rich carboxy-terminal domain, 2                                                    |
| 200999_s_at | CKAP4                   | cytoskeleton-associated protein 4                                                                                                    |
| 200884_at   | CKB                     | creatine kinase, brain                                                                                                               |
| 202712_s_at | CKMT1A ///<br>CKMT1B    | creatine kinase, mitochondrial 1A /// creatine kinase, mitochondrial 1B                                                              |
| 210107_at   | CLCA1                   | chloride channel accessory 1                                                                                                         |
| 220026_at   | CLCA4                   | chloride channel accessory 4                                                                                                         |
| 214598_at   | CLDN8                   | claudin 8                                                                                                                            |
| 227742_at   | CLIC6                   | chloride intracellular channel 6                                                                                                     |
| 201769_at   | CLINT1                  | clathrin interactor 1                                                                                                                |
| 242287_at   | CLIP1                   | CAP-GLY domain containing linker protein 1                                                                                           |
| 213839_at   | CLMN                    | calmin (calponin-like, transmembrane)                                                                                                |
| 229777_at   | CLRN3                   | clarin 3                                                                                                                             |
| 205172_x_at | CLTB                    | clathrin, light chain B                                                                                                              |
| 205518_s_at | CMAH                    | cytidine monophosphate-N-acetylneuraminic acid hydroxylase (CMP-N-acetylneuraminate monooxygenase) pseudogene                        |
| 241065_x_at | CMAS                    | Cytidine monophosphate N-acetylneuraminic acid synthetase                                                                            |
| 234981_x_at | CMBL                    | carboxymethylenebutenolidase homolog (Pseudomonas)                                                                                   |
| 224998_at   | CMTM4                   | CKLF-like MARVEL transmembrane domain containing 4                                                                                   |
| 217752_s_at | CNDP2                   | CNDP dipeptidase 2 (metallopeptidase M20 family)                                                                                     |
| 1554522_at  | CNNM2                   | cyclin M2                                                                                                                            |
| 218900_at   | CNNM4                   | cyclin M4                                                                                                                            |
| 229831_at   | CNTN3                   | contactin 3 (plasmacytoma associated)                                                                                                |
| 229084_at   | CNTN4                   | contactin 4                                                                                                                          |
| 243608_at   | COG2                    | component of oligomeric golgi complex 2                                                                                              |
| 213379_at   | COQ2                    | coenzyme Q2 homolog, prenyltransferase (yeast)                                                                                       |
| 224583_at   | COTL1                   | coactosin-like 1 (Dictyostelium)                                                                                                     |
| 213758_at   | COX4I1                  | cytochrome c oxidase subunit IV isoform 1                                                                                            |
| 229426_at   | COX5A                   | cytochrome c oxidase subunit Va                                                                                                      |
| 201134_x_at | COX7C                   | cytochrome c oxidase subunit VIIc                                                                                                    |
| 206100_at   | CPM                     | carboxypeptidase M                                                                                                                   |
| 241706_at   | CPNE8                   | copine VIII                                                                                                                          |
| 203633_at   | CPT1A                   | carnitine palmitoyltransferase 1A (liver)                                                                                            |
| 204264_at   | CPT2                    | carnitine palmitoyltransferase 2                                                                                                     |
| 213059_at   | CREB3L1                 | cAMP responsive element binding protein 3-like 1                                                                                     |
| 226455_at   | CREB3L4                 | cAMP responsive element binding protein 3-like 4                                                                                     |

|              |                    |                                                                                                           |
|--------------|--------------------|-----------------------------------------------------------------------------------------------------------|
| 218358_at    | CRELD2             | cysteine-rich with EGF-like domains 2                                                                     |
| 205081_at    | CRIP1              | cysteine-rich protein 1 (intestinal)                                                                      |
| 204573_at    | CROT               | carnitine O-octanoyltransferase                                                                           |
| 214030_at    | CRYBG3             | beta-gamma crystallin domain containing 3                                                                 |
| 205489_at    | CRYM               | crystallin, mu                                                                                            |
| 1552347_at   | CRYZL1             | crystallin, zeta (quinone reductase)-like 1                                                               |
| 210835_s_at  | CTBP2              | C-terminal binding protein 2                                                                              |
| 201906_s_at  | CTDSPL             | CTD (carboxy-terminal domain, RNA polymerase II, polypeptide A) small phosphatase-like                    |
| 217127_at    | CTH                | cystathionase (cystathionine gamma-lyase)                                                                 |
| 208407_s_at  | CTNND1             | catenin (cadherin-associated protein), delta 1                                                            |
| 205927_s_at  | CTSE               | cathepsin E                                                                                               |
| 232617_at    | CTSS               | cathepsin S                                                                                               |
| 201059_at    | CTTN               | cortactin                                                                                                 |
| 237040_at    | CWF19L2            | CWF19-like 2, cell cycle control (S. pombe)                                                               |
| 220723_s_at  | CWH43              | cell wall biogenesis 43 C-terminal homolog (S. cerevisiae)                                                |
| 214677_x_at  | CYAT1 /// IGLV1-44 | cyclosporin A transporter 1 /// immunoglobulin lambda variable 1-44                                       |
| 244546_at    | CYCS               | cytochrome c, somatic                                                                                     |
| 213295_at    | CYLD               | cylindromatosis (turban tumor syndrome)                                                                   |
| 1556006_s_at | CSNK1A1            | Casein kinase 1, alpha 1                                                                                  |
| 235017_s_at  | CSRNP3             | cysteine-serine-rich nuclear protein 3                                                                    |
| 200621_at    | CSRP1              | cysteine and glycine-rich protein 1                                                                       |
| 229665_at    | CSTF3              | cleavage stimulation factor, 3' pre-RNA, subunit 3, 77kDa                                                 |
| 228738_at    | D2HGDH             | D-2-hydroxyglutarate dehydrogenase                                                                        |
| 216060_s_at  | DAAM1              | dishevelled associated activator of morphogenesis 1                                                       |
| 219290_x_at  | DAPP1              | dual adaptor of phosphotyrosine and 3-phosphoinositides                                                   |
| 205370_x_at  | DBT                | dihydrolipoamide branched chain transacylase E2                                                           |
| 243318_at    | DCAF8              | DDB1 and CUL4 associated factor 8                                                                         |
| 203409_at    | DDB2               | damage-specific DNA binding protein 2, 48kDa                                                              |
| 213998_s_at  | DDX17              | DEAD (Asp-Glu-Ala-Asp) box polypeptide 17                                                                 |
| 200702_s_at  | DDX24              | DEAD (Asp-Glu-Ala-Asp) box polypeptide 24                                                                 |
| 227485_at    | DDX26B             | DEAD/H (Asp-Glu-Ala-Asp/His) box polypeptide 26B                                                          |
| 223662_x_at  | DDX59              | DEAD (Asp-Glu-Ala-Asp) box polypeptide 59                                                                 |
| 1564164_at   | DENND1B            | DENN/MADD domain containing 1B                                                                            |
| 53991_at     | DENND2A            | DENN/MADD domain containing 2A                                                                            |
| 221081_s_at  | DENND2D            | DENN/MADD domain containing 2D                                                                            |
| 91617_at     | DGCR8              | DiGeorge syndrome critical region gene 8                                                                  |
| 203385_at    | DGKA               | diacylglycerol kinase, alpha 80kDa                                                                        |
| 218547_at    | DHDDS              | dehydrodolichyl diphosphate synthase                                                                      |
| 213279_at    | DHRS1              | dehydrogenase/reductase (SDR family) member 1                                                             |
| 218756_s_at  | DHRS11             | dehydrogenase/reductase (SDR family) member 11                                                            |
| 218021_at    | DHRS4 /// DHRS4L2  | dehydrogenase/reductase (SDR family) member 4 ///<br>dehydrogenase/reductase (SDR family) member 4 like 2 |
| 219799_s_at  | DHRS9              | dehydrogenase/reductase (SDR family) member 9                                                             |
| 213229_at    | DICER1             | dicer 1, ribonuclease type III                                                                            |
| 215529_x_at  | DIP2A              | DIP2 disco-interacting protein 2 homolog A (Drosophila)                                                   |
| 229579_s_at  | DISP2              | dispatched homolog 2 (Drosophila)                                                                         |
| 213546_at    | DKFZP58611420      | hypothetical protein DKFZp58611420                                                                        |
| 214247_s_at  | DKK3               | dickkopf homolog 3 (Xenopus laevis)                                                                       |
| 230229_at    | DLG1               | Discs, large homolog 1 (Drosophila)                                                                       |
| 233056_x_at  | DLGAP4             | discs, large (Drosophila) homolog-associated protein 4                                                    |
| 224215_s_at  | DLL1               | delta-like 1 (Drosophila)                                                                                 |



|              |                  |                                                                                                |
|--------------|------------------|------------------------------------------------------------------------------------------------|
| 215210_s_at  | DLST             | dihydrolipoamide S-succinyltransferase (E2 component of 2-oxo-glutarate complex)               |
| 212820_at    | DMXL2            | Dmx-like 2                                                                                     |
| 223054_at    | DNAJB11          | DnaJ (Hsp40) homolog, subfamily B, member 11                                                   |
| 222620_s_at  | DNAJC1           | DnaJ (Hsp40) homolog, subfamily C, member 1                                                    |
| 223722_at    | DNAJC12          | DnaJ (Hsp40) homolog, subfamily C, member 12                                                   |
| 244193_at    | DNAJC22          | DnaJ (Hsp40) homolog, subfamily C, member 22                                                   |
| 242562_at    | DNAJC24          | DnaJ (Hsp40) homolog, subfamily C, member 24                                                   |
| 228622_s_at  | DNAJC4           | DnaJ (Hsp40) homolog, subfamily C, member 4                                                    |
| 57739_at     | DND1             | dead end homolog 1 (zebrafish)                                                                 |
| 230263_s_at  | DOCK5            | Dedicator of cytokinesis 5                                                                     |
| 209691_s_at  | DOK4             | docking protein 4                                                                              |
| 221817_at    | DOLPP1           | dolichyl pyrophosphate phosphatase 1                                                           |
| 236442_at    | DPF3             | D4, zinc and double PHD fingers, family 3                                                      |
| 222041_at    | DPH1 /// OVCA2   | DPH1 homolog (S. cerevisiae) /// ovarian tumor suppressor candidate 2                          |
| 228598_at    | DPP10            | dipeptidyl-peptidase 10 (non-functional)                                                       |
| 203716_s_at  | DPP4             | dipeptidyl-peptidase 4                                                                         |
| 236055_at    | DQX1             | DEAQ box RNA-dependent ATPase 1                                                                |
| 204750_s_at  | DSC2             | desmocollin 2                                                                                  |
| 236649_at    | DTWD1            | DTW domain containing 1                                                                        |
| 224616_at    | DYNC1LI2         | dynein, cytoplasmic 1, light intermediate chain 2                                              |
| 228361_at    | E2F2             | E2F transcription factor 2                                                                     |
| 223243_s_at  | EDEM3            | ER degradation enhancer, mannosidase alpha-like 3                                              |
| 209058_at    | EDF1             | endothelial differentiation-related factor 1                                                   |
| 225275_at    | EDIL3            | EGF-like repeats and discoidin I-like domains 3                                                |
| 208399_s_at  | EDN3             | endothelin 3                                                                                   |
| 228752_at    | EFCAB4B          | EF-hand calcium binding domain 4B                                                              |
| 220591_s_at  | EFHC2            | EF-hand domain (C-terminal) containing 2                                                       |
| 222483_at    | EFHD2            | EF-hand domain family, member D2                                                               |
| 214036_at    | EFNA5            | ephrin-A5                                                                                      |
| 202669_s_at  | EFNB2            | ephrin-B2                                                                                      |
| 232360_at    | EHF              | ets homologous factor                                                                          |
| 205222_at    | EHHADH           | enoyl-CoA, hydratase/3-hydroxyacyl CoA dehydrogenase                                           |
| 214805_at    | EIF4A1           | Eukaryotic translation initiation factor 4A1                                                   |
| 201936_s_at  | EIF4G3           | eukaryotic translation initiation factor 4 gamma, 3                                            |
| 213757_at    | EIF5A            | Eukaryotic translation initiation factor 5A                                                    |
| 201510_at    | ELF3             | E74-like factor 3 (ets domain transcription factor, epithelial-specific )                      |
| 219518_s_at  | ELL3 /// SERINC4 | elongation factor RNA polymerase II-like 3 /// serine incorporator 4                           |
| 210868_s_at  | ELOVL6           | ELOVL family member 6, elongation of long chain fatty acids (FEN1/Elo2, SUR4/Elo3-like, yeast) |
| 235623_at    | ELP2             | Elongation protein 2 homolog (S. cerevisiae)                                                   |
| 1569868_s_at | EME2             | essential meiotic endonuclease 1 homolog 2 (S. pombe)                                          |
| 204398_s_at  | EML2             | echinoderm microtubule associated protein like 2                                               |
| 204975_at    | EMP2             | epithelial membrane protein 2                                                                  |
| 212573_at    | ENDOD1           | endonuclease domain containing 1                                                               |
| 204142_at    | ENOSF1           | enolase superfamily member 1                                                                   |
| 205757_at    | ENTPD5           | ectonucleoside triphosphate diphosphohydrolase 5                                               |
| 230629_s_at  | EP400            | E1A binding protein p400                                                                       |
| 212681_at    | EPB41L3          | erythrocyte membrane protein band 4.1-like 3                                                   |
| 228256_s_at  | EPB41L4A         | erythrocyte membrane protein band 4.1 like 4A                                                  |
| 223426_s_at  | EPB41L4B         | erythrocyte membrane protein band 4.1 like 4B                                                  |

|              |                                               |                                                                                                                                                                                                 |
|--------------|-----------------------------------------------|-------------------------------------------------------------------------------------------------------------------------------------------------------------------------------------------------|
| 206114_at    | EPHA4                                         | EPH receptor A4                                                                                                                                                                                 |
| 209368_at    | EPHX2                                         | epoxide hydrolase 2, cytoplasmic                                                                                                                                                                |
| 202909_at    | EPM2AIP1                                      | EPM2A (laforin) interacting protein 1                                                                                                                                                           |
| 223895_s_at  | EPN3                                          | epsin 3                                                                                                                                                                                         |
| 202414_at    | ERCC5                                         | excision repair cross-complementing rodent repair deficiency, complementation group 5                                                                                                           |
| 214372_x_at  | ERN2                                          | endoplasmic reticulum to nucleus signaling 2                                                                                                                                                    |
| 235645_at    | ESCO1                                         | establishment of cohesion 1 homolog 1 (S. cerevisiae)                                                                                                                                           |
| 225846_at    | ESRP1                                         | epithelial splicing regulatory protein 1                                                                                                                                                        |
| 229223_at    | ESRP2                                         | epithelial splicing regulatory protein 2                                                                                                                                                        |
| 201573_s_at  | ETF1                                          | eukaryotic translation termination factor 1                                                                                                                                                     |
| 202942_at    | ETFB                                          | electron-transfer-flavoprotein, beta polypeptide                                                                                                                                                |
| 205530_at    | ETFDH                                         | electron-transferring-flavoprotein dehydrogenase                                                                                                                                                |
| 204034_at    | ETHE1                                         | ethylmalonic encephalopathy 1                                                                                                                                                                   |
| 224833_at    | ETS1                                          | v-ets erythroblastosis virus E26 oncogene homolog 1 (avian)                                                                                                                                     |
| 221911_at    | ETV1                                          | ets variant 1                                                                                                                                                                                   |
| 208297_s_at  | EVI5                                          | ecotropic viral integration site 5                                                                                                                                                              |
| 229966_at    | EWSR1                                         | Ewing sarcoma breakpoint region 1                                                                                                                                                               |
| 214802_at    | EXOC7                                         | exocyst complex component 7                                                                                                                                                                     |
| 213929_at    | EXPH5                                         | exophilin 5                                                                                                                                                                                     |
| 230183_at    | EXT1                                          | exostosin 1                                                                                                                                                                                     |
| 213506_at    | F2RL1                                         | coagulation factor II (thrombin) receptor-like 1                                                                                                                                                |
| 204231_s_at  | FAAH                                          | fatty acid amide hydrolase                                                                                                                                                                      |
| 205892_s_at  | FABP1                                         | fatty acid binding protein 1, liver                                                                                                                                                             |
| 202345_s_at  | FABP5                                         | fatty acid binding protein 5 (psoriasis-associated)                                                                                                                                             |
| 227960_s_at  | FAHD1                                         | fumarylacetoacetate hydrolase domain containing 1                                                                                                                                               |
| 223058_at    | FAM107B                                       | family with sequence similarity 107, member B                                                                                                                                                   |
| 226697_at    | FAM114A1                                      | family with sequence similarity 114, member A1                                                                                                                                                  |
| 226475_at    | FAM118A                                       | family with sequence similarity 118, member A                                                                                                                                                   |
| 230009_at    | FAM118B                                       | family with sequence similarity 118, member B                                                                                                                                                   |
| 239391_at    | FAM120AOS                                     | Family with sequence similarity 120A opposite strand                                                                                                                                            |
| 220720_x_at  | FAM128B                                       | family with sequence similarity 128, member B                                                                                                                                                   |
| 222291_at    | FAM149A                                       | family with sequence similarity 149, member A                                                                                                                                                   |
| 238018_at    | FAM150B                                       | family with sequence similarity 150, member B                                                                                                                                                   |
| 223637_s_at  | FAM160A2                                      | family with sequence similarity 160, member A2                                                                                                                                                  |
| 242608_x_at  | FAM161B                                       | Family with sequence similarity 161, member B                                                                                                                                                   |
| 220942_x_at  | FAM162A                                       | family with sequence similarity 162, member A                                                                                                                                                   |
| 235850_at    | FAM162A                                       | family with sequence similarity 162, member A                                                                                                                                                   |
| 51158_at     | FAM174B                                       | family with sequence similarity 174, member B                                                                                                                                                   |
| 227029_at    | FAM177A1                                      | family with sequence similarity 177, member A1                                                                                                                                                  |
| 229762_at    | FAM200A                                       | Family with sequence similarity 200, member A                                                                                                                                                   |
| 226722_at    | FAM20C                                        | family with sequence similarity 20, member C                                                                                                                                                    |
| 212929_s_at  | FAM21A /// FAM21B<br>/// FAM21C ///<br>FAM21D | family with sequence similarity 21, member A /// family with sequence similarity 21, member B /// family with sequence similarity 21, member C /// family with sequence similarity 21, member D |
| 227676_at    | FAM3D                                         | family with sequence similarity 3, member D                                                                                                                                                     |
| 224973_at    | FAM46A                                        | family with sequence similarity 46, member A                                                                                                                                                    |
| 220306_at    | FAM46C                                        | family with sequence similarity 46, member C                                                                                                                                                    |
| 1561387_a_at | FAM55A                                        | family with sequence similarity 55, member A                                                                                                                                                    |
| 220645_at    | FAM55D                                        | family with sequence similarity 55, member D                                                                                                                                                    |
| 228115_at    | FAM59A                                        | family with sequence similarity 59, member A                                                                                                                                                    |
| 217562_at    | FAM5C                                         | family with sequence similarity 5, member C                                                                                                                                                     |

|              |                    |                                                                    |
|--------------|--------------------|--------------------------------------------------------------------|
| 226062_x_at  | FAM63A             | family with sequence similarity 63, member A                       |
| 226356_at    | FAM73B             | family with sequence similarity 73, member B                       |
| 235349_at    | FAM82A1            | family with sequence similarity 82, member A1                      |
| 220312_at    | FAM83E             | family with sequence similarity 83, member E                       |
| 224866_at    | FAR1               | fatty acyl CoA reductase 1                                         |
| 239108_at    | FAR2               | Fatty acyl CoA reductase 2                                         |
| 232063_x_at  | FARSB              | phenylalanyl-tRNA synthetase, beta subunit                         |
| 204781_s_at  | FAS                | Fas (TNF receptor superfamily, member 6)                           |
| 227203_at    | FBXL17             | F-box and leucine-rich repeat protein 17                           |
| 242829_x_at  | FBXL3              | F-box and leucine-rich repeat protein 3                            |
| 241762_at    | FBXO32             | F-box protein 32                                                   |
| 215600_x_at  | FBXW12             | F-box and WD repeat domain containing 12                           |
| 203240_at    | FCGBP              | Fc fragment of IgG binding protein                                 |
| 241954_at    | FDFT1              | Farnesyl-diphosphate farnesyltransferase 1                         |
| 230559_x_at  | FGD4               | FYVE, RhoGEF and PH domain containing 4                            |
| 206404_at    | FGF9               | fibroblast growth factor 9 (glia-activating factor)                |
| 205014_at    | FGFBP1             | fibroblast growth factor binding protein 1                         |
| 203638_s_at  | FGFR2              | fibroblast growth factor receptor 2                                |
| 208228_s_at  | FGFR2              | fibroblast growth factor receptor 2                                |
| 204379_s_at  | FGFR3              | fibroblast growth factor receptor 3                                |
| 201540_at    | FHL1               | four and a half LIM domains 1                                      |
| 203391_at    | FKBP2              | FK506 binding protein 2, 13kDa                                     |
| 218003_s_at  | FKBP3              | FK506 binding protein 3, 25kDa                                     |
| 224840_at    | FKBP5              | FK506 binding protein 5                                            |
| 241627_x_at  | FLJ10357           | protein SOLO                                                       |
| 226706_at    | FLJ23867 /// QSOX1 | hypothetical protein FLJ23867 /// quiescin Q6 sulfhydryl oxidase 1 |
| 243309_at    | FLJ27352           | hypothetical LOC145788                                             |
| 1560010_a_at | FLJ32063           | hypothetical LOC150538                                             |
| 227593_at    | FLJ37453           | hypothetical LOC729614                                             |
| 220352_x_at  | FLJ42627           | hypothetical LOC645644                                             |
| 230404_at    | FLJ44606           | glutaredoxin-like protein YDR286C homolog                          |
| 1566558_x_at | FLJ90757           | hypothetical LOC440465                                             |
| 208614_s_at  | FLNB               | filamin B, beta                                                    |
| 205776_at    | FMO5               | flavin containing monooxygenase 5                                  |
| 230389_at    | FNBP1              | formin binding protein 1                                           |
| 229272_at    | FNBP4              | formin binding protein 4                                           |
| 225922_at    | FNIP2              | folliculin interacting protein 2                                   |
| 237086_at    | FOXA1              | Forkhead box A1                                                    |
| 223287_s_at  | FOXP1              | forkhead box P1                                                    |
| 243278_at    | FOXP2              | forkhead box P2                                                    |
| 226145_s_at  | FRAS1              | Fraser syndrome 1                                                  |
| 229893_at    | FRMD3              | FERM domain containing 3                                           |
| 213056_at    | FRMD4B             | FERM domain containing 4B                                          |
| 212548_s_at  | FRYL               | FRY-like                                                           |
| 203697_at    | FRZB               | frizzled-related protein                                           |
| 214211_at    | FTH1               | ferritin, heavy polypeptide 1                                      |
| 212847_at    | FUBP1              | Far upstream element (FUSE) binding protein 1                      |
| 202838_at    | FUCA1              | fucosidase, alpha-L- 1, tissue                                     |
| 202489_s_at  | FXYD3              | FXYD domain containing ion transport regulator 3                   |
| 211795_s_at  | FYB                | FYN binding protein                                                |
| 204451_at    | FZD1               | frizzled homolog 1 (Drosophila)                                    |
| 221245_s_at  | FZD5               | frizzled homolog 5 (Drosophila)                                    |

|              |         |                                                                                                  |
|--------------|---------|--------------------------------------------------------------------------------------------------|
| 227405_s_at  | FZD8    | frizzled homolog 8 (Drosophila)                                                                  |
| 214987_at    | GAB1    | GRB2-associated binding protein 1                                                                |
| 1557122_s_at | GABRB2  | gamma-aminobutyric acid (GABA) A receptor, beta 2                                                |
| 40225_at     | GAK     | cyclin G associated kinase                                                                       |
| 234974_at    | GALM    | galactose mutarotase (aldose 1-epimerase)                                                        |
| 201724_s_at  | GALNT1  | UDP-N-acetyl-alpha-D-galactosamine:polypeptide N-acetylgalactosaminyltransferase 1 (GalNAc-T1)   |
| 218885_s_at  | GALNT12 | UDP-N-acetyl-alpha-D-galactosamine:polypeptide N-acetylgalactosaminyltransferase 12 (GalNAc-T12) |
| 236129_at    | GALNT5  | UDP-N-acetyl-alpha-D-galactosamine:polypeptide N-acetylgalactosaminyltransferase 5 (GalNAc-T5)   |
| 222587_s_at  | GALNT7  | UDP-N-acetyl-alpha-D-galactosamine:polypeptide N-acetylgalactosaminyltransferase 7 (GalNAc-T7)   |
| 228238_at    | GAS5    | growth arrest-specific 5 (non-protein coding)                                                    |
| 224627_at    | GBA2    | glucosidase, beta (bile acid) 2                                                                  |
| 222943_at    | GBA3    | glucosidase, beta, acid 3 (cytosolic)                                                            |
| 210589_s_at  | GBAP1   | glucosidase, beta, acid pseudogene 1                                                             |
| 206422_at    | GCG     | glucagon                                                                                         |
| 230788_at    | GCNT2   | glucosaminyl (N-acetyl) transferase 2, I-branching enzyme (I blood group)                        |
| 219508_at    | GCNT3   | glucosaminyl (N-acetyl) transferase 3, mucin type                                                |
| 219722_s_at  | GDPD3   | glycerophosphodiester phosphodiesterase domain containing 3                                      |
| 236225_at    | GGT6    | gamma-glutamyltransferase 6                                                                      |
| 207525_s_at  | GIPC1   | GIPC PDZ domain containing family, member 1                                                      |
| 223278_at    | GJB2    | gap junction protein, beta 2, 26kDa                                                              |
| 230360_at    | GLDN    | gliomedin                                                                                        |
| 225604_s_at  | GLIPR2  | GLI pathogenesis-related 2                                                                       |
| 229435_at    | GLIS3   | GLIS family zinc finger 3                                                                        |
| 221932_s_at  | GLRX5   | glutaredoxin 5                                                                                   |
| 219267_at    | GLTP    | glycolipid transfer protein                                                                      |
| 219920_s_at  | GMPPB   | GDP-mannose pyrophosphorylase B                                                                  |
| 213766_x_at  | GNA11   | guanine nucleotide binding protein (G protein), alpha 11 (Gq class)                              |
| 227692_at    | GNAI1   | guanine nucleotide binding protein (G protein), alpha inhibiting activity polypeptide 1          |
| 202615_at    | GNAQ    | Guanine nucleotide binding protein (G protein), q polypeptide                                    |
| 222034_at    | GNB2L1  | Guanine nucleotide binding protein (G protein), beta polypeptide 2-like 1                        |
| 205042_at    | GNE     | glucosamine (UDP-N-acetyl)-2-epimerase/N-acetylmannosamine kinase                                |
| 224964_s_at  | GNG2    | guanine nucleotide binding protein (G protein), gamma 2                                          |
| 240106_at    | GNPTAB  | N-acetylglucosamine-1-phosphate transferase, alpha and beta subunits                             |
| 35436_at     | GOLGA2  | golgin A2                                                                                        |
| 233198_at    | GOLGA2B | golgin A2 family, member B                                                                       |
| 202106_at    | GOLGA3  | golgin A3                                                                                        |
| 215203_at    | GOLGA4  | golgin A4                                                                                        |
| 208798_x_at  | GOLGA8A | golgin A8 family, member A                                                                       |
| 217771_at    | GOLM1   | golgi membrane protein 1                                                                         |
| 208813_at    | GOT1    | glutamic-oxaloacetic transaminase 1, soluble (aspartate aminotransferase 1)                      |
| 206681_x_at  | GP2     | glycoprotein 2 (zymogen granule membrane)                                                        |
| 205929_at    | GPA33   | glycoprotein A33 (transmembrane)                                                                 |
| 1556126_s_at | GPATCH2 | G patch domain containing 2                                                                      |
| 212510_at    | GPD1L   | glycerol-3-phosphate dehydrogenase 1-like                                                        |

|             |                          |                                                                                                                 |
|-------------|--------------------------|-----------------------------------------------------------------------------------------------------------------|
| 240856_at   | GPR120                   | G protein-coupled receptor 120                                                                                  |
| 210473_s_at | GPR125                   | G protein-coupled receptor 125                                                                                  |
| 232350_x_at | GPR161                   | G protein-coupled receptor 161                                                                                  |
| 206747_at   | GPRIN2                   | G protein regulated inducer of neurite outgrowth 2                                                              |
| 239595_at   | GPX2                     | glutathione peroxidase 2 (gastrointestinal)                                                                     |
| 227628_at   | GPX8                     | glutathione peroxidase 8 (putative)                                                                             |
| 219313_at   | GRAMD1C                  | GRAM domain containing 1C                                                                                       |
| 238049_at   | GRAMD3                   | GRAM domain containing 3                                                                                        |
| 212856_at   | GRAMD4                   | GRAM domain containing 4                                                                                        |
| 219233_s_at | GSDMB                    | gasdermin B                                                                                                     |
| 200696_s_at | GSN                      | gelsolin                                                                                                        |
| 240452_at   | GSPT1                    | G1 to S phase transition 1                                                                                      |
| 225609_at   | GSR                      | glutathione reductase                                                                                           |
| 203924_at   | GSTA1                    | glutathione S-transferase alpha 1                                                                               |
| 235405_at   | GSTA4                    | glutathione S-transferase alpha 4                                                                               |
| 217751_at   | GSTK1                    | glutathione S-transferase kappa 1                                                                               |
| 209531_at   | GSTZ1                    | glutathione transferase zeta 1                                                                                  |
| 222104_x_at | GTF2H3                   | general transcription factor IIH, polypeptide 3, 34kDa                                                          |
| 225083_at   | GTF3C6                   | general transcription factor IIIC, polypeptide 6, alpha 35kDa                                                   |
| 211040_x_at | GTSE1                    | G-2 and S-phase expressed 1                                                                                     |
| 207003_at   | GUCA2A                   | guanylate cyclase activator 2A (guanylin)                                                                       |
| 215599_at   | GUSBP3                   | glucuronidase, beta pseudogene 3                                                                                |
| 201007_at   | HADHB                    | hydroxyacyl-CoA dehydrogenase/3-ketoacyl-CoA thiolase/enoyl-CoA hydratase (trifunctional protein), beta subunit |
| 205523_at   | HAPLN1                   | hyaluronan and proteoglycan link protein 1                                                                      |
| 220071_x_at | HAUS2                    | HAUS augmin-like complex, subunit 2                                                                             |
| 209524_at   | HDGFRP3                  | hepatoma-derived growth factor, related protein 3                                                               |
| 242349_at   | HECTD1                   | HECT domain containing 1                                                                                        |
| 242601_at   | HEPACAM2                 | HEPACAM family member 2                                                                                         |
| 203903_s_at | HEPH                     | hephaestin                                                                                                      |
| 231928_at   | HES2                     | hairy and enhancer of split 2 (Drosophila)                                                                      |
| 205221_at   | HGD                      | homogentisate 1,2-dioxygenase                                                                                   |
| 213374_x_at | HIBCH                    | 3-hydroxyisobutyryl-CoA hydrolase                                                                               |
| 200989_at   | HIF1A                    | hypoxia inducible factor 1, alpha subunit (basic helix-loop-helix transcription factor)                         |
| 217845_x_at | HIGD1A                   | HIG1 hypoxia inducible domain family, member 1A                                                                 |
| 1555960_at  | HINT1                    | histidine triad nucleotide binding protein 1                                                                    |
| 236278_at   | HIST1H3E                 | Histone cluster 1, H3e                                                                                          |
| 202934_at   | HK2                      | hexokinase 2                                                                                                    |
| 202772_at   | HMGCL                    | 3-hydroxymethyl-3-methylglutaryl-CoA lyase                                                                      |
| 204607_at   | HMGCS2                   | 3-hydroxy-3-methylglutaryl-CoA synthase 2 (mitochondrial)                                                       |
| 221606_s_at | HMGN5                    | high-mobility group nucleosome binding domain 5                                                                 |
| 205313_at   | HNF1B                    | HNF1 homeobox B                                                                                                 |
| 222040_at   | HNRNPA1                  | heterogeneous nuclear ribonucleoprotein A1                                                                      |
| 1555653_at  | HNRNPA3 ///<br>HNRNPA3P1 | heterogeneous nuclear ribonucleoprotein A3 /// heterogeneous nuclear ribonucleoprotein A3 pseudogene 1          |
| 213359_at   | HNRNPD                   | Heterogeneous nuclear ribonucleoprotein D (AU-rich element RNA binding protein 1, 37kDa)                        |
| 214918_at   | HNRNPM                   | heterogeneous nuclear ribonucleoprotein M                                                                       |
| 214639_s_at | HOXA1                    | homeobox A1                                                                                                     |
| 230666_at   | HOXA11AS                 | HOXA11 antisense RNA (non-protein coding)                                                                       |
| 213844_at   | HOXA5                    | homeobox A5                                                                                                     |

|              |                                                 |                                                                                                                                                                    |
|--------------|-------------------------------------------------|--------------------------------------------------------------------------------------------------------------------------------------------------------------------|
| 235753_at    | HOXA7                                           | homeobox A7                                                                                                                                                        |
| 230105_at    | HOXB13                                          | homeobox B13                                                                                                                                                       |
| 205601_s_at  | HOXB5                                           | homeobox B5                                                                                                                                                        |
| 205366_s_at  | HOXB6                                           | homeobox B6                                                                                                                                                        |
| 205975_s_at  | HOXD1                                           | homeobox D1                                                                                                                                                        |
| 236681_at    | HOXD13                                          | homeobox D13                                                                                                                                                       |
| 205522_at    | HOXD4 /// MIR10B                                | homeobox D4 /// microRNA 10b                                                                                                                                       |
| 231906_at    | HOXD8                                           | homeobox D8                                                                                                                                                        |
| 1554251_at   | HP1BP3                                          | heterochromatin protein 1, binding protein 3                                                                                                                       |
| 206726_at    | HPGDS                                           | hematopoietic prostaglandin D synthase                                                                                                                             |
| 222881_at    | HPSE                                            | heparanase                                                                                                                                                         |
| 235496_at    | HRCT1                                           | histidine rich carboxyl terminus 1                                                                                                                                 |
| 232594_at    | HSBP1L1                                         | heat shock factor binding protein 1-like 1                                                                                                                         |
| 204130_at    | HSD11B2                                         | hydroxysteroid (11-beta) dehydrogenase 2                                                                                                                           |
| 217989_at    | HSD17B11                                        | hydroxysteroid (17-beta) dehydrogenase 11                                                                                                                          |
| 204818_at    | HSD17B2                                         | hydroxysteroid (17-beta) dehydrogenase 2                                                                                                                           |
| 216449_x_at  | HSP90B1                                         | heat shock protein 90kDa beta (Grp94), member 1                                                                                                                    |
| 200799_at    | HSPA1A                                          | heat shock 70kDa protein 1A                                                                                                                                        |
| 211538_s_at  | HSPA2                                           | heat shock 70kDa protein 2                                                                                                                                         |
| 201565_s_at  | ID2                                             | inhibitor of DNA binding 2, dominant negative helix-loop-helix protein                                                                                             |
| 213931_at    | ID2 /// ID2B                                    | inhibitor of DNA binding 2, dominant negative helix-loop-helix protein<br>/// inhibitor of DNA binding 2B, dominant negative helix-loop-helix protein (pseudogene) |
| 1558956_s_at | IFT80                                           | intraflagellar transport 80 homolog (Chlamydomonas)                                                                                                                |
| 217022_s_at  | IGH@ /// IGHA1 ///<br>IGHA2 ///<br>LOC100126583 | immunoglobulin heavy locus /// immunoglobulin heavy constant alpha 1 /// immunoglobulin heavy constant alpha 2 (A2m marker) ///<br>hypothetical LOC100126583       |
| 212592_at    | IGJ                                             | immunoglobulin J polypeptide, linker protein for immunoglobulin alpha and mu polypeptides                                                                          |
| 214836_x_at  | IGK@ /// IGKC                                   | immunoglobulin kappa locus /// immunoglobulin kappa constant                                                                                                       |
| 209138_x_at  | IGL@                                            | Immunoglobulin lambda locus                                                                                                                                        |
| 215946_x_at  | IGLL3                                           | immunoglobulin lambda-like polypeptide 3                                                                                                                           |
| 202421_at    | IGSF3                                           | immunoglobulin superfamily, member 3                                                                                                                               |
| 231929_at    | IKZF2                                           | IKAROS family zinc finger 2 (Helios)                                                                                                                               |
| 202948_at    | IL1R1                                           | interleukin 1 receptor, type I                                                                                                                                     |
| 205403_at    | IL1R2                                           | interleukin 1 receptor, type II                                                                                                                                    |
| 205945_at    | IL6R                                            | interleukin 6 receptor                                                                                                                                             |
| 226333_at    | IL6R                                            | interleukin 6 receptor                                                                                                                                             |
| 235583_at    | ILDR1                                           | immunoglobulin-like domain containing receptor 1                                                                                                                   |
| 203011_at    | IMPA1                                           | inositol(myo)-1(or 4)-monophosphatase 1                                                                                                                            |
| 203126_at    | IMPA2                                           | inositol(myo)-1(or 4)-monophosphatase 2                                                                                                                            |
| 218144_s_at  | INF2                                            | inverted formin, FH2 and WH2 domain containing                                                                                                                     |
| 221091_at    | INSL5                                           | insulin-like 5                                                                                                                                                     |
| 206502_s_at  | INSM1                                           | insulinoma-associated 1                                                                                                                                            |
| 233193_x_at  | INTS4                                           | integrator complex subunit 4                                                                                                                                       |
| 223165_s_at  | IP6K2                                           | inositol hexakisphosphate kinase 2                                                                                                                                 |
| 203474_at    | IQGAP2                                          | IQ motif containing GTPase activating protein 2                                                                                                                    |
| 206104_at    | ISL1                                            | ISL LIM homeobox 1                                                                                                                                                 |
| 232707_at    | ISX                                             | intestine-specific homeobox                                                                                                                                        |
| 223597_at    | ITLN1                                           | intelectin 1 (galactofuranose binding)                                                                                                                             |
| 202746_at    | ITM2A                                           | integral membrane protein 2A                                                                                                                                       |
| 221004_s_at  | ITM2C                                           | integral membrane protein 2C                                                                                                                                       |
| 210740_s_at  | ITPK1                                           | inositol 1,3,4-triphosphate 5/6 kinase                                                                                                                             |

|              |                                                                                        |                                                                                                                                                                                                                                                                                                                  |
|--------------|----------------------------------------------------------------------------------------|------------------------------------------------------------------------------------------------------------------------------------------------------------------------------------------------------------------------------------------------------------------------------------------------------------------|
| 225311_at    | IVD                                                                                    | isovaleryl-CoA dehydrogenase                                                                                                                                                                                                                                                                                     |
| 201362_at    | IVNS1ABP                                                                               | influenza virus NS1A binding protein                                                                                                                                                                                                                                                                             |
| 203845_at    | KAT2B                                                                                  | K(lysine) acetyltransferase 2B                                                                                                                                                                                                                                                                                   |
| 220727_at    | KCNK10                                                                                 | potassium channel, subfamily K, member 10                                                                                                                                                                                                                                                                        |
| 221584_s_at  | KCNMA1                                                                                 | potassium large conductance calcium-activated channel, subfamily M, alpha member 1                                                                                                                                                                                                                               |
| 226245_at    | KCTD1                                                                                  | potassium channel tetramerisation domain containing 1                                                                                                                                                                                                                                                            |
| 212188_at    | KCTD12                                                                                 | potassium channel tetramerisation domain containing 12                                                                                                                                                                                                                                                           |
| 222668_at    | KCTD15                                                                                 | potassium channel tetramerisation domain containing 15                                                                                                                                                                                                                                                           |
| 200699_at    | KDEL2                                                                                  | KDEL (Lys-Asp-Glu-Leu) endoplasmic reticulum protein retention receptor 2                                                                                                                                                                                                                                        |
| 227056_at    | KIAA0141                                                                               | KIAA0141                                                                                                                                                                                                                                                                                                         |
| 213242_x_at  | KIAA0284                                                                               | KIAA0284                                                                                                                                                                                                                                                                                                         |
| 214295_at    | KIAA0485                                                                               | hypothetical LOC57235                                                                                                                                                                                                                                                                                            |
| 204546_at    | KIAA0513                                                                               | KIAA0513                                                                                                                                                                                                                                                                                                         |
| 212456_at    | KIAA0664                                                                               | KIAA0664                                                                                                                                                                                                                                                                                                         |
| 207305_s_at  | KIAA1012                                                                               | KIAA1012                                                                                                                                                                                                                                                                                                         |
| 212779_at    | KIAA1109                                                                               | KIAA1109                                                                                                                                                                                                                                                                                                         |
| 227230_s_at  | KIAA1211                                                                               | KIAA1211                                                                                                                                                                                                                                                                                                         |
| 232046_at    | KIAA1217                                                                               | KIAA1217                                                                                                                                                                                                                                                                                                         |
| 1562063_x_at | KIAA1245 ///<br>LOC200030 ///<br>NBPF1 /// NBPF10<br>/// NBPF11 ///<br>NBPF8 /// NBPF9 | KIAA1245 /// neuroblastoma breakpoint family, member 11-like ///<br>neuroblastoma breakpoint family, member 1 /// neuroblastoma<br>breakpoint family, member 10 /// neuroblastoma breakpoint family,<br>member 11 /// neuroblastoma breakpoint family, member 8 ///<br>neuroblastoma breakpoint family, member 9 |
| 243589_at    | KIAA1267 ///<br>LOC100294337                                                           | KIAA1267 /// hypothetical protein LOC100294337                                                                                                                                                                                                                                                                   |
| 221874_at    | KIAA1324                                                                               | KIAA1324                                                                                                                                                                                                                                                                                                         |
| 225327_at    | KIAA1370                                                                               | KIAA1370                                                                                                                                                                                                                                                                                                         |
| 235956_at    | KIAA1377                                                                               | KIAA1377                                                                                                                                                                                                                                                                                                         |
| 225508_at    | KIAA1468                                                                               | KIAA1468                                                                                                                                                                                                                                                                                                         |
| 233893_s_at  | KIAA1530                                                                               | KIAA1530                                                                                                                                                                                                                                                                                                         |
| 232030_at    | KIAA1632                                                                               | KIAA1632                                                                                                                                                                                                                                                                                                         |
| 1569302_at   | KIAA1731                                                                               | KIAA1731                                                                                                                                                                                                                                                                                                         |
| 220777_at    | KIF13A                                                                                 | kinesin family member 13A                                                                                                                                                                                                                                                                                        |
| 232083_at    | KIF16B                                                                                 | kinesin family member 16B                                                                                                                                                                                                                                                                                        |
| 238477_at    | KIF1C                                                                                  | kinesin family member 1C                                                                                                                                                                                                                                                                                         |
| 203129_s_at  | KIF5C                                                                                  | kinesin family member 5C                                                                                                                                                                                                                                                                                         |
| 226792_s_at  | KIFC2                                                                                  | kinesin family member C2                                                                                                                                                                                                                                                                                         |
| 205051_s_at  | KIT                                                                                    | v-kit Hardy-Zuckerman 4 feline sarcoma viral oncogene homolog                                                                                                                                                                                                                                                    |
| 226534_at    | KITLG                                                                                  | KIT ligand                                                                                                                                                                                                                                                                                                       |
| 221841_s_at  | KLF4                                                                                   | Kruppel-like factor 4 (gut)                                                                                                                                                                                                                                                                                      |
| 209211_at    | KLF5                                                                                   | Kruppel-like factor 5 (intestinal)                                                                                                                                                                                                                                                                               |
| 203542_s_at  | KLF9                                                                                   | Kruppel-like factor 9                                                                                                                                                                                                                                                                                            |
| 221219_s_at  | KLHDC4                                                                                 | kelch domain containing 4                                                                                                                                                                                                                                                                                        |
| 206551_x_at  | KLHL24                                                                                 | kelch-like 24 (Drosophila)                                                                                                                                                                                                                                                                                       |
| 235727_at    | KLHL28                                                                                 | kelch-like 28 (Drosophila)                                                                                                                                                                                                                                                                                       |
| 216699_s_at  | KLK1                                                                                   | kallikrein 1                                                                                                                                                                                                                                                                                                     |
| 205821_at    | KLRK1                                                                                  | killer cell lectin-like receptor subfamily K, member 1                                                                                                                                                                                                                                                           |
| 204009_s_at  | KRAS                                                                                   | v-Ki-ras2 Kirsten rat sarcoma viral oncogene homolog                                                                                                                                                                                                                                                             |
| 233329_s_at  | KRCC1                                                                                  | lysine-rich coiled-coil 1                                                                                                                                                                                                                                                                                        |
| 201650_at    | KRT19                                                                                  | keratin 19                                                                                                                                                                                                                                                                                                       |
| 213953_at    | KRT20                                                                                  | keratin 20                                                                                                                                                                                                                                                                                                       |

|                     |                                                                               |                                                                                                                                                                                                                                                                                           |
|---------------------|-------------------------------------------------------------------------------|-------------------------------------------------------------------------------------------------------------------------------------------------------------------------------------------------------------------------------------------------------------------------------------------|
| <b>209008_x_at</b>  | KRT8                                                                          | keratin 8                                                                                                                                                                                                                                                                                 |
| <b>200914_x_at</b>  | KTN1                                                                          | kinectin 1 (kinesin receptor)                                                                                                                                                                                                                                                             |
| <b>229393_at</b>    | L3MBTL3                                                                       | l(3)mbt-like 3 (Drosophila)                                                                                                                                                                                                                                                               |
| <b>227048_at</b>    | LAMA1                                                                         | laminin, alpha 1                                                                                                                                                                                                                                                                          |
| <b>241385_at</b>    | LARP7                                                                         | La ribonucleoprotein domain family, member 7                                                                                                                                                                                                                                              |
| <b>206268_at</b>    | LEFTY1                                                                        | left-right determination factor 1                                                                                                                                                                                                                                                         |
| <b>218717_s_at</b>  | LEPREL1                                                                       | leprecan-like 1                                                                                                                                                                                                                                                                           |
| <b>208450_at</b>    | LGALS2                                                                        | lectin, galactoside-binding, soluble, 2                                                                                                                                                                                                                                                   |
| <b>1557197_a_at</b> | LGALS3                                                                        | lectin, galactoside-binding, soluble, 3                                                                                                                                                                                                                                                   |
| <b>204272_at</b>    | LGALS4                                                                        | lectin, galactoside-binding, soluble, 4                                                                                                                                                                                                                                                   |
| <b>218326_s_at</b>  | LGR4                                                                          | leucine-rich repeat-containing G protein-coupled receptor 4                                                                                                                                                                                                                               |
| <b>217892_s_at</b>  | LIMA1                                                                         | LIM domain and actin binding 1                                                                                                                                                                                                                                                            |
| <b>202193_at</b>    | LIMK2                                                                         | LIM domain kinase 2                                                                                                                                                                                                                                                                       |
| <b>1554455_at</b>   | LINS1                                                                         | lines homolog 1 (Drosophila)                                                                                                                                                                                                                                                              |
| <b>235871_at</b>    | LIPH                                                                          | lipase, member H                                                                                                                                                                                                                                                                          |
| <b>212089_at</b>    | LMNA                                                                          | lamin A/C                                                                                                                                                                                                                                                                                 |
| <b>242633_x_at</b>  | LOC100128510                                                                  | hypothetical protein LOC100128510                                                                                                                                                                                                                                                         |
| <b>236118_at</b>    | LOC100128893                                                                  | hypothetical protein LOC100128893                                                                                                                                                                                                                                                         |
| <b>233527_at</b>    | LOC100129069                                                                  | Hypothetical protein LOC100129069                                                                                                                                                                                                                                                         |
| <b>242364_x_at</b>  | LOC100131096                                                                  | hypothetical LOC100131096                                                                                                                                                                                                                                                                 |
| <b>1558569_at</b>   | LOC100131541                                                                  | Hypothetical LOC100131541                                                                                                                                                                                                                                                                 |
| <b>211996_s_at</b>  | LOC100132247 ///<br>LOC348162 ///<br>LOC613037 ///<br>LOC728888 ///<br>NPIPL3 | similar to Uncharacterized protein KIAA0220 /// hypothetical protein 348162 /// nuclear pore complex interacting protein pseudogene /// similar to acyl-CoA synthetase medium-chain family member 2 /// nuclear pore complex interacting protein-like 3                                   |
| <b>227234_at</b>    | LOC100132815                                                                  | Hypothetical protein LOC100132815                                                                                                                                                                                                                                                         |
| <b>1559125_at</b>   | LOC100133019                                                                  | similar to hCG1983765                                                                                                                                                                                                                                                                     |
| <b>214850_at</b>    | LOC100170939                                                                  | glucuronidase, beta pseudogene                                                                                                                                                                                                                                                            |
| <b>235167_at</b>    | LOC100190986                                                                  | hypothetical LOC100190986                                                                                                                                                                                                                                                                 |
| <b>226809_at</b>    | LOC100216479                                                                  | hypothetical LOC100216479                                                                                                                                                                                                                                                                 |
| <b>235217_at</b>    | LOC100216546                                                                  | hypothetical LOC100216546                                                                                                                                                                                                                                                                 |
| <b>213089_at</b>    | LOC100272216                                                                  | hypothetical LOC100272216                                                                                                                                                                                                                                                                 |
| <b>228528_at</b>    | LOC100286909                                                                  | Hypothetical protein LOC100286909                                                                                                                                                                                                                                                         |
| <b>230991_at</b>    | LOC100287411                                                                  | Similar to proline-rich nuclear receptor coactivator 2                                                                                                                                                                                                                                    |
| <b>215123_at</b>    | LOC100288332 ///<br>LOC100288583 ///<br>NPIPL3                                | similar to acyl-CoA synthetase medium-chain family member 2 /// hypothetical protein LOC100288583 /// nuclear pore complex interacting protein-like 3                                                                                                                                     |
| <b>236656_s_at</b>  | LOC100288911                                                                  | hypothetical protein LOC100288911                                                                                                                                                                                                                                                         |
| <b>1560089_at</b>   | LOC100289019                                                                  | hypothetical LOC100289019                                                                                                                                                                                                                                                                 |
| <b>232919_at</b>    | LOC100289297                                                                  | Hypothetical protein LOC100289297                                                                                                                                                                                                                                                         |
| <b>233775_x_at</b>  | LOC100289333                                                                  | Hypothetical protein LOC100289333                                                                                                                                                                                                                                                         |
| <b>232420_x_at</b>  | LOC100289341                                                                  | similar to hCG2022304                                                                                                                                                                                                                                                                     |
| <b>1556078_at</b>   | LOC100289632                                                                  | Hypothetical protein LOC100289632                                                                                                                                                                                                                                                         |
| <b>233960_s_at</b>  | LOC115110                                                                     | hypothetical protein LOC115110                                                                                                                                                                                                                                                            |
| <b>230505_at</b>    | LOC145474                                                                     | hypothetical protein LOC145474                                                                                                                                                                                                                                                            |
| <b>239594_at</b>    | LOC145837                                                                     | hypothetical LOC145837                                                                                                                                                                                                                                                                    |
| <b>239965_at</b>    | LOC151878                                                                     | hypothetical protein LOC151878                                                                                                                                                                                                                                                            |
| <b>220609_at</b>    | LOC202181                                                                     | hypothetical protein LOC202181                                                                                                                                                                                                                                                            |
| <b>230077_at</b>    | LOC220729 ///<br>SDHA /// SDHAP1 ///<br>SDHAP2                                | succinate dehydrogenase complex, subunit A, flavoprotein pseudogene /// succinate dehydrogenase complex, subunit A, flavoprotein (Fp) /// succinate dehydrogenase complex, subunit A, flavoprotein pseudogene 1 /// succinate dehydrogenase complex, subunit A, flavoprotein pseudogene 2 |



|              |                           |                                                                                                                         |
|--------------|---------------------------|-------------------------------------------------------------------------------------------------------------------------|
| 230937_at    | LOC285835                 | hypothetical protein LOC285835                                                                                          |
| 217506_at    | LOC339290                 | Hypothetical LOC339290                                                                                                  |
| 232455_x_at  | LOC340085                 | hypothetical protein LOC340085                                                                                          |
| 241418_at    | LOC344887                 | Similar to hCG2041270                                                                                                   |
| 236351_at    | LOC389023                 | hypothetical gene supported by BC032913; BC048425                                                                       |
| 237450_at    | LOC389332                 | hypothetical LOC389332                                                                                                  |
| 236001_at    | LOC400573                 | hypothetical gene supported by BC015790; BC041634                                                                       |
| 228601_at    | LOC401022                 | hypothetical LOC401022                                                                                                  |
| 239313_at    | LOC401320                 | Hypothetical LOC401320                                                                                                  |
| 1557293_at   | LOC440993                 | hypothetical LOC440993                                                                                                  |
| 240890_at    | LOC643733                 | hypothetical LOC643733                                                                                                  |
| 242889_x_at  | LOC645431                 | hypothetical LOC645431                                                                                                  |
| 238715_at    | LOC646014                 | Hypothetical protein LOC646014                                                                                          |
| 238143_at    | LOC646627                 | phospholipase inhibitor                                                                                                 |
| 1568780_at   | LOC649305                 | hypothetical LOC649305                                                                                                  |
| 239241_at    | LOC727869                 | hypothetical LOC727869                                                                                                  |
| 1559322_at   | LOC727916                 | hypothetical protein LOC727916                                                                                          |
| 233599_at    | LOC728061                 | hCG2003663                                                                                                              |
| 1560199_x_at | LOC728153                 | similar to FAM133B protein                                                                                              |
| 239319_at    | LOC728342                 | Hypothetical protein LOC728342                                                                                          |
| 213737_x_at  | LOC728498                 | Golgin subfamily A member 8-like protein 1                                                                              |
| 1555872_a_at | LOC728903 ///<br>MGC21881 | hypothetical LOC728903 /// hypothetical locus MGC21881                                                                  |
| 214291_at    | LOC729046 ///<br>RPL17    | similar to ribosomal protein L17 /// ribosomal protein L17                                                              |
| 214375_at    | LOC729222 ///<br>PPFIBP1  | similar to PTPRF interacting protein binding protein 1 /// PTPRF interacting protein, binding protein 1 (liprin beta 1) |
| 218366_x_at  | LOC731602 ///<br>METT11D1 | similar to methyltransferase 11 domain containing 1 isoform 2 /// methyltransferase 11 domain containing 1              |
| 213502_x_at  | LOC91316                  | glucuronidase, beta/immunoglobulin lambda-like polypeptide 1 pseudogene                                                 |
| 221833_at    | LONP2                     | Lon peptidase 2, peroxisomal                                                                                            |
| 242931_at    | LONRF3                    | LON peptidase N-terminal domain and ring finger 3                                                                       |
| 204036_at    | LPAR1                     | lysophosphatidic acid receptor 1                                                                                        |
| 230252_at    | LPAR5                     | lysophosphatidic acid receptor 5                                                                                        |
| 213078_x_at  | LPCAT4                    | lysophosphatidylcholine acyltransferase 4                                                                               |
| 202821_s_at  | LPP                       | LIM domain containing preferred translocation partner in lipoma                                                         |
| 226908_at    | LRIG3                     | leucine-rich repeats and immunoglobulin-like domains 3                                                                  |
| 204674_at    | LRMP                      | lymphoid-restricted membrane protein                                                                                    |
| 35974_at     | LRMP                      | lymphoid-restricted membrane protein                                                                                    |
| 220376_at    | LRRC19                    | leucine rich repeat containing 19                                                                                       |
| 220622_at    | LRRC31                    | leucine rich repeat containing 31                                                                                       |
| 224686_x_at  | LRRC37A2                  | Leucine rich repeat containing 37, member A2                                                                            |
| 211452_x_at  | LRRFIP1                   | leucine rich repeat (in FLII) interacting protein 1                                                                     |
| 220610_s_at  | LRRFIP2                   | leucine rich repeat (in FLII) interacting protein 2                                                                     |
| 224512_s_at  | LSMD1                     | LSM domain containing 1                                                                                                 |
| 208835_s_at  | LUC7L3                    | LUC7-like 3 (S. cerevisiae)                                                                                             |
| 218729_at    | LXN                       | latexin                                                                                                                 |
| 227712_at    | LYRM2                     | LYR motif containing 2                                                                                                  |
| 210943_s_at  | LYST                      | lysosomal trafficking regulator                                                                                         |
| 232168_x_at  | MACF1                     | microtubule-actin crosslinking factor 1                                                                                 |
| 226770_at    | MAGI3                     | membrane associated guanylate kinase, WW and PDZ domain containing 3                                                    |

|             |          |                                                                                                |
|-------------|----------|------------------------------------------------------------------------------------------------|
| 231735_s_at | MALAT1   | metastasis associated lung adenocarcinoma transcript 1 (non-protein coding)                    |
| 229473_at   | MAMDC4   | MAM domain containing 4                                                                        |
| 204388_s_at | MAOA     | monoamine oxidase A                                                                            |
| 205698_s_at | MAP2K6   | mitogen-activated protein kinase kinase 6                                                      |
| 219278_at   | MAP3K6   | mitogen-activated protein kinase kinase kinase 6                                               |
| 203553_s_at | MAP4K5   | mitogen-activated protein kinase kinase kinase kinase 5                                        |
| 213256_at   | MARCH3   | membrane-associated ring finger (C3HC4) 3                                                      |
| 201669_s_at | MARCKS   | myristoylated alanine-rich protein kinase C substrate                                          |
| 235141_at   | MARVELD2 | MARVEL domain containing 2                                                                     |
| 233634_at   | MARVELD3 | MARVEL domain containing 3                                                                     |
| 202350_s_at | MATN2    | matrilin 2                                                                                     |
| 204179_at   | MB       | myoglobin                                                                                      |
| 203353_s_at | MBD1     | methyl-CpG binding domain protein 1                                                            |
| 209579_s_at | MBD4     | methyl-CpG binding domain protein 4                                                            |
| 201152_s_at | MBNL1    | muscleblind-like (Drosophila)                                                                  |
| 232138_at   | MBNL2    | Muscleblind-like 2 (Drosophila)                                                                |
| 229498_at   | MBNL3    | muscleblind-like 3 (Drosophila)                                                                |
| 227379_at   | MBOAT1   | membrane bound O-acyltransferase domain containing 1                                           |
| 229021_at   | MCTP2    | multiple C2 domains, transmembrane 2                                                           |
| 211675_s_at | MDFIC    | MyoD family inhibitor domain containing                                                        |
| 235374_at   | MDH1     | Malate dehydrogenase 1, NAD (soluble)                                                          |
| 236814_at   | MDM4     | Mdm4 p53 binding protein homolog (mouse)                                                       |
| 226420_at   | MECOM    | MDS1 and EVI1 complex locus                                                                    |
| 226958_s_at | MED11    | mediator complex subunit 11                                                                    |
| 207078_at   | MED6     | mediator complex subunit 6                                                                     |
| 204069_at   | MEIS1    | Meis homeobox 1                                                                                |
| 214077_x_at | MEIS3P1  | Meis homeobox 3 pseudogene 1                                                                   |
| 242111_at   | METTL3   | methyltransferase like 3                                                                       |
| 209703_x_at | METTL7A  | methyltransferase like 7A                                                                      |
| 201155_s_at | MFN2     | mitofusin 2                                                                                    |
| 218109_s_at | MFSD1    | major facilitator superfamily domain containing 1                                              |
| 242372_s_at | MFSD4    | major facilitator superfamily domain containing 4                                              |
| 228040_at   | MGC21881 | hypothetical locus MGC21881                                                                    |
| 239001_at   | MGST1    | Microsomal glutathione S-transferase 1                                                         |
| 204168_at   | MGST2    | microsomal glutathione S-transferase 2                                                         |
| 201403_s_at | MGST3    | microsomal glutathione S-transferase 3                                                         |
| 212310_at   | MIA3     | melanoma inhibitory activity family, member 3                                                  |
| 219332_at   | MICALL2  | MICAL-like 2                                                                                   |
| 214246_x_at | MINK1    | misshapen-like kinase 1 (zebrafish)                                                            |
| 243256_at   | MKNK1    | MAP kinase interacting serine/threonine kinase 1                                               |
| 223190_s_at | MLL5     | myeloid/lymphoid or mixed-lineage leukemia 5 (trithorax homolog, Drosophila)                   |
| 1569652_at  | MLLT3    | myeloid/lymphoid or mixed-lineage leukemia (trithorax homolog, Drosophila); translocated to, 3 |
| 218211_s_at | MLPH     | melanophilin                                                                                   |
| 225157_at   | MLXIP    | MLX interacting protein                                                                        |
| 239273_s_at | MMP28    | matrix metalloproteinase 28                                                                    |
| 219265_at   | MOBK12B  | MOB1, Mps One Binder kinase activator-like 2B (yeast)                                          |
| 232428_at   | MOGAT2   | monoacylglycerol O-acyltransferase 2                                                           |
| 212754_s_at | MON2     | MON2 homolog (S. cerevisiae)                                                                   |
| 235864_at   | MPP5     | Membrane protein, palmitoylated 5 (MAGUK p55 subfamily member 5)                               |

|             |         |                                                                       |
|-------------|---------|-----------------------------------------------------------------------|
| 213727_x_at | MPPE1   | metallophosphoesterase 1                                              |
| 210210_at   | MPZL1   | myelin protein zero-like 1                                            |
| 230518_at   | MPZL2   | myelin protein zero-like 2                                            |
| 227226_at   | MRAP2   | melanocortin 2 receptor accessory protein 2                           |
| 222775_s_at | MRPL35  | mitochondrial ribosomal protein L35                                   |
| 222499_at   | MRPS16  | mitochondrial ribosomal protein S16                                   |
| 237560_at   | MRPS5   | Mitochondrial ribosomal protein S5                                    |
| 220834_at   | MS4A12  | membrane-spanning 4-domains, subfamily A, member 12                   |
| 224355_s_at | MS4A8B  | membrane-spanning 4-domains, subfamily A, member 8B                   |
| 216320_x_at | MST1    | macrophage stimulating 1 (hepatocyte growth factor-like)              |
| 215563_s_at | MST1P9  | macrophage stimulating 1 (hepatocyte growth factor-like) pseudogene 9 |
| 216336_x_at | MT1E    | metallothionein 1E                                                    |
| 213629_x_at | MT1F    | metallothionein 1F                                                    |
| 204745_x_at | MT1G    | metallothionein 1G                                                    |
| 206461_x_at | MT1H    | metallothionein 1H                                                    |
| 217546_at   | MT1M    | metallothionein 1M                                                    |
| 211456_x_at | MT1P2   | metallothionein 1 pseudogene 2                                        |
| 204326_x_at | MT1X    | metallothionein 1X                                                    |
| 212185_x_at | MT2A    | metallothionein 2A                                                    |
| 36920_at    | MTM1    | myotubularin 1                                                        |
| 205076_s_at | MTMR11  | myotubularin related protein 11                                       |
| 233101_at   | MTMR9   | myotubularin related protein 9                                        |
| 239576_at   | MTUS1   | Microtubule associated tumor suppressor 1                             |
| 213693_s_at | MUC1    | mucin 1, cell surface associated                                      |
| 226654_at   | MUC12   | mucin 12, cell surface associated                                     |
| 204673_at   | MUC2    | mucin 2, oligomeric mucus/gel-forming                                 |
| 214898_x_at | MUC3B   | mucin 3B, cell surface associated                                     |
| 204895_x_at | MUC4    | mucin 4, cell surface associated                                      |
| 213432_at   | MUC5B   | mucin 5B, oligomeric mucus/gel-forming                                |
| 218139_s_at | MUDENG  | MU-2/AP1M2 domain containing, death-inducing                          |
| 223347_at   | MUM1    | melanoma associated antigen (mutated) 1                               |
| 202180_s_at | MVP     | major vault protein                                                   |
| 201497_x_at | MYH11   | myosin, heavy chain 11, smooth muscle                                 |
| 214002_at   | MYL6    | myosin, light chain 6, alkali, smooth muscle and non-muscle           |
| 236022_at   | MYO19   | myosin XIX                                                            |
| 211916_s_at | MYO1A   | myosin IA                                                             |
| 214656_x_at | MYO1C   | myosin IC                                                             |
| 218966_at   | MYO5C   | myosin VC                                                             |
| 242512_at   | MYO9A   | myosin IXA                                                            |
| 201798_s_at | MYOF    | myoferlin                                                             |
| 232946_s_at | NADSYN1 | NAD synthetase 1                                                      |
| 218189_s_at | NANS    | N-acetylneuraminic acid synthase                                      |
| 219368_at   | NAP1L2  | nucleosome assembly protein 1-like 2                                  |
| 238722_x_at | NAPEPLD | N-acyl phosphatidylethanolamine phospholipase D                       |
| 200027_at   | NARS    | asparaginyl-tRNA synthetase                                           |
| 201969_at   | NASP    | nuclear autoantigenic sperm protein (histone-binding)                 |
| 214440_at   | NAT1    | N-acetyltransferase 1 (arylamine N-acetyltransferase)                 |
| 1554106_at  | NBEAL1  | neurobeachin-like 1                                                   |
| 37005_at    | NBL1    | neuroblastoma, suppression of tumorigenicity 1                        |
| 230712_at   | NBPF1   | neuroblastoma breakpoint family, member 1                             |
| 214693_x_at | NBPF10  | neuroblastoma breakpoint family, member 10                            |

|              |            |                                                                                               |
|--------------|------------|-----------------------------------------------------------------------------------------------|
| 228993_s_at  | NCRNA00081 | non-protein coding RNA 81                                                                     |
| 225786_at    | NCRNA00201 | non-protein coding RNA 201                                                                    |
| 234594_at    | NCRNA00203 | non-protein coding RNA 203                                                                    |
| 1564070_s_at | NCRNA00213 | non-protein coding RNA 213                                                                    |
| 209550_at    | NDN        | necdin homolog (mouse)                                                                        |
| 227739_at    | NDOR1      | NADPH dependent diflavin oxidoreductase 1                                                     |
| 206453_s_at  | NDRG2      | NDRG family member 2                                                                          |
| 209224_s_at  | NDUFA2     | NADH dehydrogenase (ubiquinone) 1 alpha subcomplex, 2, 8kDa                                   |
| 202000_at    | NDUFA6     | NADH dehydrogenase (ubiquinone) 1 alpha subcomplex, 6, 14kDa                                  |
| 206790_s_at  | NDUFB1     | NADH dehydrogenase (ubiquinone) 1 beta subcomplex, 1, 7kDa                                    |
| 201227_s_at  | NDUFB8     | NADH dehydrogenase (ubiquinone) 1 beta subcomplex, 8, 19kDa                                   |
| 232169_x_at  | NDUFS8     | NADH dehydrogenase (ubiquinone) Fe-S protein 8, 23kDa (NADH-coenzyme Q reductase)             |
| 224565_at    | NEAT1      | nuclear paraspeckle assembly transcript 1 (non-protein coding)                                |
| 212448_at    | NEDD4L     | neural precursor cell expressed, developmentally down-regulated 4-like                        |
| 202149_at    | NEDD9      | neural precursor cell expressed, developmentally down-regulated 9                             |
| 204321_at    | NEO1       | neogenin homolog 1 (chicken)                                                                  |
| 222957_at    | NEU4       | sialidase 4                                                                                   |
| 217526_at    | NFATC2IP   | nuclear factor of activated T-cells, cytoplasmic, calcineurin-dependent 2 interacting protein |
| 226895_at    | NFIC       | Nuclear factor I/C (CCAAT-binding transcription factor)                                       |
| 201502_s_at  | NFKBIA     | nuclear factor of kappa light polypeptide gene enhancer in B-cells inhibitor, alpha           |
| 202215_s_at  | NFYC       | nuclear transcription factor Y, gamma                                                         |
| 226490_at    | NHSL1      | NHS-like 1                                                                                    |
| 232158_x_at  | NIPAL1     | NIPA-like domain containing 1                                                                 |
| 227001_at    | NIPAL2     | NIPA-like domain containing 2                                                                 |
| 225876_at    | NIPAL3     | NIPA-like domain containing 3                                                                 |
| 202891_at    | NIT1       | nitrilase 1                                                                                   |
| 202379_s_at  | NKTR       | natural killer-tumor recognition sequence                                                     |
| 206915_at    | NKX2-2     | NK2 homeobox 2                                                                                |
| 234762_x_at  | NLN        | Neurolysin (metallopeptidase M3 family)                                                       |
| 221690_s_at  | NLRP2      | NLR family, pyrin domain containing 2                                                         |
| 214722_at    | NOTCH2NL   | Notch homolog 2 (Drosophila) N-terminal like                                                  |
| 214321_at    | NOV        | nephroblastoma overexpressed gene                                                             |
| 218086_at    | NPDC1      | neural proliferation, differentiation and control, 1                                          |
| 235432_at    | NPHP3      | nephronophthisis 3 (adolescent)                                                               |
| 201865_x_at  | NR3C1      | nuclear receptor subfamily 3, group C, member 1 (glucocorticoid receptor)                     |
| 205259_at    | NR3C2      | nuclear receptor subfamily 3, group C, member 2                                               |
| 208343_s_at  | NR5A2      | nuclear receptor subfamily 5, group A, member 2                                               |
| 210174_at    | NR5A2      | nuclear receptor subfamily 5, group A, member 2                                               |
| 226499_at    | NRARP      | NOTCH-regulated ankyrin repeat protein                                                        |
| 229422_at    | NRD1       | nardilysin (N-arginine dibasic convertase)                                                    |
| 202600_s_at  | NRIP1      | nuclear receptor interacting protein 1                                                        |
| 1566785_x_at | NSF        | N-ethylmaleimide-sensitive factor                                                             |
| 232148_at    | NSMAF      | Neutral sphingomyelinase (N-SMase) activation associated factor                               |
| 222128_at    | NSUN6      | NOP2/Sun domain family, member 6                                                              |
| 238983_at    | NSUN7      | NOP2/Sun domain family, member 7                                                              |
| 236703_at    | NT5C2      | 5'-nucleotidase, cytosolic II                                                                 |
| 203939_at    | NT5E       | 5'-nucleotidase, ecto (CD73)                                                                  |
| 223315_at    | NTN4       | netrin 4                                                                                      |

|             |                      |                                                                                                                 |
|-------------|----------------------|-----------------------------------------------------------------------------------------------------------------|
| 203675_at   | NUCB2                | nucleobindin 2                                                                                                  |
| 223535_at   | NUDT12               | nudix (nucleoside diphosphate linked moiety X)-type motif 12                                                    |
| 228341_at   | NUDT16               | nudix (nucleoside diphosphate linked moiety X)-type motif 16                                                    |
| 220183_s_at | NUDT6                | nudix (nucleoside diphosphate linked moiety X)-type motif 6                                                     |
| 218375_at   | NUDT9                | nudix (nucleoside diphosphate linked moiety X)-type motif 9                                                     |
| 214250_at   | NUMA1                | nuclear mitotic apparatus protein 1                                                                             |
| 207545_s_at | NUMB                 | numb homolog (Drosophila)                                                                                       |
| 239748_x_at | OCIAD1               | OCIA domain containing 1                                                                                        |
| 213131_at   | OLFM1                | olfactomedin 1                                                                                                  |
| 206323_x_at | OPHN1                | oligophrenin 1                                                                                                  |
| 236121_at   | OR51E2               | olfactory receptor, family 51, subfamily E, member 2                                                            |
| 218556_at   | ORMDL2               | ORM1-like 2 (S. cerevisiae)                                                                                     |
| 209485_s_at | OSBPL1A              | oxysterol binding protein-like 1A                                                                               |
| 227946_at   | OSBPL7               | oxysterol binding protein-like 7                                                                                |
| 230830_at   | OSTBETA              | organic solute transporter beta                                                                                 |
| 206048_at   | OVOL2                | ovo-like 2 (Drosophila)                                                                                         |
| 202780_at   | OXCT1                | 3-oxoacid CoA transferase 1                                                                                     |
| 207455_at   | P2RY1                | purinergic receptor P2Y, G-protein coupled, 1                                                                   |
| 235259_at   | PACRGL               | PARK2 co-regulated-like                                                                                         |
| 201651_s_at | PACSIN2              | protein kinase C and casein kinase substrate in neurons 2                                                       |
| 1554384_at  | PADI2                | peptidyl arginine deiminase, type II                                                                            |
| 225622_at   | PAG1                 | phosphoprotein associated with glycosphingolipid microdomains 1                                                 |
| 200907_s_at | PALLD                | palladin, cytoskeletal associated protein                                                                       |
| 221751_at   | PANK3                | pantothenate kinase 3                                                                                           |
| 238706_at   | PAPD4                | PAP associated domain containing 4                                                                              |
| 203058_s_at | PAPSS2               | 3'-phosphoadenosine 5'-phosphosulfate synthase 2                                                                |
| 242871_at   | PAQR5                | progesterin and adipoQ receptor family member V                                                                 |
| 204687_at   | PARM1                | prostate androgen-regulated mucin-like protein 1                                                                |
| 229515_at   | PAWR                 | PRKC, apoptosis, WT1, regulator                                                                                 |
| 219543_at   | PBLD                 | phenazine biosynthesis-like protein domain containing                                                           |
| 232613_at   | PBRM1                | polybromo 1                                                                                                     |
| 213517_at   | PCBP2                | poly(rC) binding protein 2                                                                                      |
| 208383_s_at | PCK1                 | phosphoenolpyruvate carboxykinase 1 (soluble)                                                                   |
| 213558_at   | PCLO                 | piccolo (presynaptic cytomatrix protein)                                                                        |
| 225069_at   | PCYT1A               | Phosphate cytidylyltransferase 1, choline, alpha                                                                |
| 205559_s_at | PCSK5                | proprotein convertase subtilisin/kexin type 5                                                                   |
| 203118_at   | PCSK7                | proprotein convertase subtilisin/kexin type 7                                                                   |
| 212594_at   | PDCD4                | programmed cell death 4 (neoplastic transformation inhibitor)                                                   |
| 222380_s_at | PDCD6                | Programmed cell death 6                                                                                         |
| 206792_x_at | PDE4C                | phosphodiesterase 4C, cAMP-specific (phosphodiesterase E1 dunce homolog, Drosophila)                            |
| 228962_at   | PDE4D                | phosphodiesterase 4D, cAMP-specific (phosphodiesterase E3 dunce homolog, Drosophila)                            |
| 214129_at   | PDE4DIP              | phosphodiesterase 4D interacting protein                                                                        |
| 205593_s_at | PDE9A                | phosphodiesterase 9A                                                                                            |
| 218718_at   | PDGFC                | platelet derived growth factor C                                                                                |
| 203131_at   | PDGFRA               | platelet-derived growth factor receptor, alpha polypeptide                                                      |
| 229453_at   | PDIA3                | protein disulfide isomerase family A, member 3                                                                  |
| 208658_at   | PDIA4                | protein disulfide isomerase family A, member 4                                                                  |
| 212053_at   | PDXDC1               | pyridoxal-dependent decarboxylase domain containing 1                                                           |
| 232288_at   | PDXDC1 ///<br>PDXDC2 | pyridoxal-dependent decarboxylase domain containing 1 /// pyridoxal-dependent decarboxylase domain containing 2 |

|              |          |                                                                              |
|--------------|----------|------------------------------------------------------------------------------|
| 218025_s_at  | PECI     | peroxisomal D3,D2-enoyl-CoA isomerase                                        |
| 223619_x_at  | PECR     | peroxisomal trans-2-enoyl-CoA reductase                                      |
| 232304_at    | PELI1    | Pellino homolog 1 (Drosophila)                                               |
| 220576_at    | PGAP1    | post-GPI attachment to proteins 1                                            |
| 55616_at     | PGAP3    | post-GPI attachment to proteins 3                                            |
| 215179_x_at  | PGF      | Placental growth factor                                                      |
| 235615_at    | PGGT1B   | protein geranylgeranyltransferase type I, beta subunit                       |
| 201968_s_at  | PGM1     | phosphoglucomutase 1                                                         |
| 213227_at    | PGRMC2   | progesterone receptor membrane component 2                                   |
| 221611_s_at  | PHF7     | PHD finger protein 7                                                         |
| 242248_at    | PHKB     | phosphorylase kinase, beta                                                   |
| 212134_at    | PHLDB1   | pleckstrin homology-like domain, family B, member 1                          |
| 225688_s_at  | PHLDB2   | pleckstrin homology-like domain, family B, member 2                          |
| 212719_at    | PHLPP1   | PH domain and leucine rich repeat protein phosphatase 1                      |
| 225683_x_at  | PHPT1    | phosphohistidine phosphatase 1                                               |
| 219093_at    | PID1     | phosphotyrosine interaction domain containing 1                              |
| 219048_at    | PIGN     | phosphatidylinositol glycan anchor biosynthesis, class N                     |
| 232101_s_at  | PIGN     | phosphatidylinositol glycan anchor biosynthesis, class N                     |
| 226147_s_at  | PIGR     | polymeric immunoglobulin receptor                                            |
| 241905_at    | PIK3C2A  | Phosphoinositide-3-kinase, class 2, alpha polypeptide                        |
| 217620_s_at  | PIK3CB   | phosphoinositide-3-kinase, catalytic, beta polypeptide                       |
| 225321_s_at  | PILRB    | paired immunoglobulin-like type 2 receptor beta                              |
| 209019_s_at  | PINK1    | PTEN induced putative kinase 1                                               |
| 230076_at    | PITPNM3  | PITPNM family member 3                                                       |
| 201133_s_at  | PJA2     | praja ring finger 2                                                          |
| 223551_at    | PKIB     | protein kinase (cAMP-dependent, catalytic) inhibitor beta                    |
| 207717_s_at  | PKP2     | plakophilin 2                                                                |
| 207222_at    | PLA2G10  | phospholipase A2, group X                                                    |
| 203649_s_at  | PLA2G2A  | phospholipase A2, group IIA (platelets, synovial fluid)                      |
| 210145_at    | PLA2G4A  | phospholipase A2, group IVA (cytosolic, calcium-dependent)                   |
| 219014_at    | PLAC8    | placenta-specific 8                                                          |
| 201860_s_at  | PLAT     | plasminogen activator, tissue                                                |
| 205111_s_at  | PLCE1    | phospholipase C, epsilon 1                                                   |
| 204613_at    | PLCG2    | phospholipase C, gamma 2 (phosphatidylinositol-specific)                     |
| 213309_at    | PLCL2    | phospholipase C-like 2                                                       |
| 226636_at    | PLD1     | phospholipase D1, phosphatidylcholine-specific                               |
| 229245_at    | PLEKHA6  | pleckstrin homology domain containing, family A member 6                     |
| 225726_s_at  | PLEKHH1  | pleckstrin homology domain containing, family H (with MyTH4 domain) member 1 |
| 204519_s_at  | PLLP     | plasma membrane proteolipid (plasmolipin)                                    |
| 213241_at    | PLXNC1   | plexin C1                                                                    |
| 225298_at    | PNKD     | paroxysmal nonkinesigenic dyskinesia                                         |
| 211766_s_at  | PNLIPRP2 | pancreatic lipase-related protein 2                                          |
| 207109_at    | POU2F3   | POU class 2 homeobox 3                                                       |
| 1559496_at   | PPA2     | pyrophosphatase (inorganic) 2                                                |
| 210946_at    | PPAP2A   | phosphatidic acid phosphatase type 2A                                        |
| 219195_at    | PPARGC1A | peroxisome proliferator-activated receptor gamma, coactivator 1 alpha        |
| 1553639_a_at | PPARGC1B | peroxisome proliferator-activated receptor gamma, coactivator 1 beta         |
| 204517_at    | PPIC     | peptidylprolyl isomerase C (cyclophilin C)                                   |
| 228469_at    | PPID     | Peptidylprolyl isomerase D                                                   |
| 223999_at    | PPIL2    | peptidylprolyl isomerase (cyclophilin)-like 2                                |
| 204578_at    | PIP5K1   | diphosphoinositol pentakisphosphate kinase 1                                 |

|              |          |                                                                                       |
|--------------|----------|---------------------------------------------------------------------------------------|
| 1557553_at   | PPP1R12B | protein phosphatase 1, regulatory (inhibitor) subunit 12B                             |
| 216347_s_at  | PPP1R13B | protein phosphatase 1, regulatory (inhibitor) subunit 13B                             |
| 227409_at    | PPP1R3E  | protein phosphatase 1, regulatory (inhibitor) subunit 3E                              |
| 221088_s_at  | PPP1R9A  | protein phosphatase 1, regulatory (inhibitor) subunit 9A                              |
| 236492_at    | PPP2R2A  | protein phosphatase 2, regulatory subunit B, alpha                                    |
| 209632_at    | PPP2R3A  | protein phosphatase 2 (formerly 2A), regulatory subunit B'', alpha                    |
| 203338_at    | PPP2R5E  | protein phosphatase 2, regulatory subunit B', epsilon isoform                         |
| 228070_at    | PPP2R5E  | protein phosphatase 2, regulatory subunit B', epsilon isoform                         |
| 202425_x_at  | PPP3CA   | protein phosphatase 3, catalytic subunit, alpha isozyme                               |
| 202432_at    | PPP3CB   | protein phosphatase 3, catalytic subunit, beta isozyme                                |
| 201594_s_at  | PPP4R1   | protein phosphatase 4, regulatory subunit 1                                           |
| 218208_at    | PQLC1    | PQ loop repeat containing 1                                                           |
| 215067_x_at  | PRDX2    | peroxiredoxin 2                                                                       |
| 200844_s_at  | PRDX6    | peroxiredoxin 6                                                                       |
| 237291_at    | PRDXDD1P | PrdX deacylase domain containing 1, pseudogene                                        |
| 227892_at    | PRKAA2   | protein kinase, AMP-activated, alpha 2 catalytic subunit                              |
| 202742_s_at  | PRKACB   | protein kinase, cAMP-dependent, catalytic, beta                                       |
| 204842_x_at  | PRKAR2A  | protein kinase, cAMP-dependent, regulatory, type II, alpha                            |
| 203680_at    | PRKAR2B  | protein kinase, cAMP-dependent, regulatory, type II, beta                             |
| 1552797_s_at | PROM2    | prominin 2                                                                            |
| 230270_at    | PRPF38B  | PRP38 pre-mRNA processing factor 38 (yeast) domain containing B                       |
| 202127_at    | PRPF4B   | PRP4 pre-mRNA processing factor 4 homolog B (yeast)                                   |
| 232215_x_at  | PRR11    | proline rich 11                                                                       |
| 207291_at    | PRRG4    | proline rich Gla (G-carboxyglutamic acid) 4 (transmembrane)                           |
| 242055_at    | PSMG4    | Proteasome (prosome, macropain) assembly chaperone 4                                  |
| 226110_at    | PTAR1    | protein prenyltransferase alpha subunit repeat containing 1                           |
| 222796_at    | PTCD1    | pentatricopeptide repeat domain 1                                                     |
| 225363_at    | PTEN     | phosphatase and tensin homolog                                                        |
| 215894_at    | PTGDR    | prostaglandin D2 receptor (DP)                                                        |
| 204897_at    | PTGER4   | prostaglandin E receptor 4 (subtype EP4)                                              |
| 205128_x_at  | PTGS1    | prostaglandin-endoperoxide synthase 1 (prostaglandin G/H synthase and cyclooxygenase) |
| 200733_s_at  | PTP4A1   | protein tyrosine phosphatase type IVA, member 1                                       |
| 226380_at    | PTPN21   | protein tyrosine phosphatase, non-receptor type 21                                    |
| 212587_s_at  | PTPRC    | protein tyrosine phosphatase, receptor type, C                                        |
| 200636_s_at  | PTPRF    | protein tyrosine phosphatase, receptor type, F                                        |
| 208300_at    | PTPRH    | protein tyrosine phosphatase, receptor type, H                                        |
| 1555579_s_at | PTPRM    | protein tyrosine phosphatase, receptor type, M                                        |
| 213325_at    | PVRL3    | poliovirus receptor-related 3                                                         |
| 227999_at    | PWWP2B   | PWWP domain containing 2B                                                             |
| 219076_s_at  | PXMP2    | peroxisomal membrane protein 2, 22kDa                                                 |
| 211253_x_at  | PYY      | peptide YY                                                                            |
| 230523_at    | QSOX1    | quiescin Q6 sulfhydryl oxidase 1                                                      |
| 202252_at    | RAB13    | RAB13, member RAS oncogene family                                                     |
| 243496_at    | RAB18    | RAB18, member RAS oncogene family                                                     |
| 219562_at    | RAB26    | RAB26, member RAS oncogene family                                                     |
| 210951_x_at  | RAB27A   | RAB27A, member RAS oncogene family                                                    |
| 228708_at    | RAB27B   | RAB27B, member RAS oncogene family                                                    |
| 217597_x_at  | RAB40B   | RAB40B, member RAS oncogene family                                                    |
| 219125_s_at  | RAG1AP1  | recombination activating gene 1 activating protein 1                                  |
| 226957_x_at  | RALBP1   | ralA binding protein 1                                                                |
| 213049_at    | RALGAPA1 | Ral GTPase activating protein, alpha subunit 1 (catalytic)                            |

|              |                                                                                                 |                                                                                                                                                                                                                                                                                                                                                                 |
|--------------|-------------------------------------------------------------------------------------------------|-----------------------------------------------------------------------------------------------------------------------------------------------------------------------------------------------------------------------------------------------------------------------------------------------------------------------------------------------------------------|
| 232500_at    | RALGAPA2                                                                                        | Ral GTPase activating protein, alpha subunit 2 (catalytic)                                                                                                                                                                                                                                                                                                      |
| 242712_x_at  | RANBP2 /// RGPLD1<br>/// RGPLD2 ///<br>RGPLD3 /// RGPLD4<br>/// RGPLD5 ///<br>RGPLD6 /// RGPLD8 | RAN binding protein 2 /// RANBP2-like and GRIP domain containing 1<br>/// RANBP2-like and GRIP domain containing 2 /// RANBP2-like and<br>GRIP domain containing 3 /// RANBP2-like and GRIP domain<br>containing 4 /// RANBP2-like and GRIP domain containing 5 ///<br>RANBP2-like and GRIP domain containing 6 /// RANBP2-like and<br>GRIP domain containing 8 |
| 202362_at    | RAP1A                                                                                           | RAP1A, member of RAS oncogene family                                                                                                                                                                                                                                                                                                                            |
| 203911_at    | RAP1GAP                                                                                         | RAP1 GTPase activating protein                                                                                                                                                                                                                                                                                                                                  |
| 218657_at    | RAPGEFL1                                                                                        | Rap guanine nucleotide exchange factor (GEF)-like 1                                                                                                                                                                                                                                                                                                             |
| 1552482_at   | RAPH1                                                                                           | Ras association (RalGDS/AF-6) and pleckstrin homology domains 1                                                                                                                                                                                                                                                                                                 |
| 206391_at    | RARRES1                                                                                         | retinoic acid receptor responder (tazarotene induced) 1                                                                                                                                                                                                                                                                                                         |
| 209496_at    | RARRES2                                                                                         | retinoic acid receptor responder (tazarotene induced) 2                                                                                                                                                                                                                                                                                                         |
| 223467_at    | RASD1                                                                                           | RAS, dexamethasone-induced 1                                                                                                                                                                                                                                                                                                                                    |
| 1553185_at   | RASEF                                                                                           | RAS and EF-hand domain containing                                                                                                                                                                                                                                                                                                                               |
| 229147_at    | RASSF6                                                                                          | Ras association (RalGDS/AF-6) domain family member 6                                                                                                                                                                                                                                                                                                            |
| 40359_at     | RASSF7                                                                                          | Ras association (RalGDS/AF-6) domain family (N-terminal) member 7                                                                                                                                                                                                                                                                                               |
| 239071_at    | RBBP4                                                                                           | Retinoblastoma binding protein 4                                                                                                                                                                                                                                                                                                                                |
| 228455_at    | RBM15                                                                                           | RNA binding motif protein 15                                                                                                                                                                                                                                                                                                                                    |
| 235004_at    | RBM24                                                                                           | RNA binding motif protein 24                                                                                                                                                                                                                                                                                                                                    |
| 236613_at    | RBM25                                                                                           | RNA binding motif protein 25                                                                                                                                                                                                                                                                                                                                    |
| 213718_at    | RBM4                                                                                            | RNA binding motif protein 4                                                                                                                                                                                                                                                                                                                                     |
| 222496_s_at  | RBM47                                                                                           | RNA binding motif protein 47                                                                                                                                                                                                                                                                                                                                    |
| 236291_at    | RDH5                                                                                            | retinol dehydrogenase 5 (11-cis/9-cis)                                                                                                                                                                                                                                                                                                                          |
| 223447_at    | REG4                                                                                            | regenerating islet-derived family, member 4                                                                                                                                                                                                                                                                                                                     |
| 202297_s_at  | RER1                                                                                            | RER1 retention in endoplasmic reticulum 1 homolog (S. cerevisiae)                                                                                                                                                                                                                                                                                               |
| 223970_at    | RETNLB                                                                                          | resistin like beta                                                                                                                                                                                                                                                                                                                                              |
| 218124_at    | RETSAT                                                                                          | retinol saturase (all-trans-retinol 13,14-reductase)                                                                                                                                                                                                                                                                                                            |
| 238736_at    | REV3L                                                                                           | REV3-like, catalytic subunit of DNA polymerase zeta (yeast)                                                                                                                                                                                                                                                                                                     |
| 1552673_at   | RFX6                                                                                            | regulatory factor X, 6                                                                                                                                                                                                                                                                                                                                          |
| 203169_at    | RGP1                                                                                            | RGP1 retrograde golgi transport homolog (S. cerevisiae)                                                                                                                                                                                                                                                                                                         |
| 210258_at    | RGS13                                                                                           | regulator of G-protein signaling 13                                                                                                                                                                                                                                                                                                                             |
| 202388_at    | RGS2                                                                                            | regulator of G-protein signaling 2, 24kDa                                                                                                                                                                                                                                                                                                                       |
| 1554897_s_at | RHBDL2                                                                                          | rhomboid, veinlet-like 2 (Drosophila)                                                                                                                                                                                                                                                                                                                           |
| 205414_s_at  | RICH2                                                                                           | Rho-type GTPase-activating protein RICH2                                                                                                                                                                                                                                                                                                                        |
| 215588_x_at  | RIOK3                                                                                           | RIO kinase 3 (yeast)                                                                                                                                                                                                                                                                                                                                            |
| 201785_at    | RNASE1                                                                                          | ribonuclease, RNase A family, 1 (pancreatic)                                                                                                                                                                                                                                                                                                                    |
| 213397_x_at  | RNASE4                                                                                          | ribonuclease, RNase A family, 4                                                                                                                                                                                                                                                                                                                                 |
| 229285_at    | RNASEL                                                                                          | ribonuclease L (2',5'-oligoadenylate synthetase-dependent)                                                                                                                                                                                                                                                                                                      |
| 207735_at    | RNF125                                                                                          | ring finger protein 125                                                                                                                                                                                                                                                                                                                                         |
| 226077_at    | RNF145                                                                                          | ring finger protein 145                                                                                                                                                                                                                                                                                                                                         |
| 233819_s_at  | RNF160                                                                                          | ring finger protein 160                                                                                                                                                                                                                                                                                                                                         |
| 219739_at    | RNF186                                                                                          | ring finger protein 186                                                                                                                                                                                                                                                                                                                                         |
| 236288_at    | RNF34                                                                                           | ring finger protein 34                                                                                                                                                                                                                                                                                                                                          |
| 226999_at    | RNPC3                                                                                           | RNA-binding region (RNP1, RRM) containing 3                                                                                                                                                                                                                                                                                                                     |
| 205805_s_at  | ROR1                                                                                            | receptor tyrosine kinase-like orphan receptor 1                                                                                                                                                                                                                                                                                                                 |
| 228806_at    | RORC                                                                                            | RAR-related orphan receptor C                                                                                                                                                                                                                                                                                                                                   |
| 221593_s_at  | RPL31                                                                                           | ribosomal protein L31                                                                                                                                                                                                                                                                                                                                           |
| 215208_x_at  | RPL35A                                                                                          | Ribosomal protein L35a                                                                                                                                                                                                                                                                                                                                          |
| 207585_s_at  | RPL36AL                                                                                         | ribosomal protein L36a-like                                                                                                                                                                                                                                                                                                                                     |
| 224766_at    | RPL37                                                                                           | Ribosomal protein L37                                                                                                                                                                                                                                                                                                                                           |
| 214041_x_at  | RPL37A                                                                                          | Ribosomal protein L37a                                                                                                                                                                                                                                                                                                                                          |
| 1555878_at   | RPS24                                                                                           | Ribosomal protein S24                                                                                                                                                                                                                                                                                                                                           |



|              |          |                                                                                                                  |
|--------------|----------|------------------------------------------------------------------------------------------------------------------|
| 218007_s_at  | RPS27L   | ribosomal protein S27-like                                                                                       |
| 203379_at    | RPS6KA1  | ribosomal protein S6 kinase, 90kDa, polypeptide 1                                                                |
| 215032_at    | RREB1    | ras responsive element binding protein 1                                                                         |
| 238412_at    | RRN3P3   | RNA polymerase I transcription factor homolog ( <i>S. cerevisiae</i> ) pseudogene 3                              |
| 230093_at    | RSPH1    | radial spoke head 1 homolog ( <i>Chlamydomonas</i> )                                                             |
| 219957_at    | RUFY2    | RUN and FYVE domain containing 2                                                                                 |
| 218377_s_at  | RWDD2B   | RWD domain containing 2B                                                                                         |
| 200872_at    | S100A10  | S100 calcium binding protein A10                                                                                 |
| 202598_at    | S100A13  | S100 calcium binding protein A13                                                                                 |
| 218677_at    | S100A14  | S100 calcium binding protein A14                                                                                 |
| 227998_at    | S100A16  | S100 calcium binding protein A16                                                                                 |
| 229402_at    | SAMD13   | sterile alpha motif domain containing 13                                                                         |
| 1570210_x_at | SAPS2    | SAPS domain family, member 2                                                                                     |
| 215591_at    | SATB2    | SATB homeobox 2                                                                                                  |
| 233914_s_at  | SBF2     | SET binding factor 2                                                                                             |
| 240830_at    | SCARNA17 | small Cajal body-specific RNA 17                                                                                 |
| 233229_at    | SCFD1    | sec1 family domain containing 1                                                                                  |
| 204035_at    | SCG2     | secretogranin II                                                                                                 |
| 203889_at    | SCG5     | secretogranin V (7B2 protein)                                                                                    |
| 205979_at    | SCGB2A1  | secretoglobin, family 2A, member 1                                                                               |
| 1552365_at   | SCIN     | scinderin                                                                                                        |
| 206950_at    | SCN9A    | sodium channel, voltage-gated, type IX, alpha subunit                                                            |
| 203453_at    | SCNN1A   | sodium channel, nonvoltage-gated 1 alpha                                                                         |
| 205464_at    | SCNN1B   | sodium channel, nonvoltage-gated 1, beta                                                                         |
| 201339_s_at  | SCP2     | sterol carrier protein 2                                                                                         |
| 211733_x_at  | SCP2     | sterol carrier protein 2                                                                                         |
| 224960_at    | SCYL2    | SCY1-like 2 ( <i>S. cerevisiae</i> )                                                                             |
| 233565_s_at  | SDCBP2   | syndecan binding protein (syntenin) 2                                                                            |
| 1569594_a_at | SDCCAG1  | serologically defined colon cancer antigen 1                                                                     |
| 201093_x_at  | SDHA     | succinate dehydrogenase complex, subunit A, flavoprotein (Fp)                                                    |
| 222021_x_at  | SDHAP1   | succinate dehydrogenase complex, subunit A, flavoprotein pseudogene 1                                            |
| 226693_at    | SDHAP2   | succinate dehydrogenase complex, subunit A, flavoprotein pseudogene 2                                            |
| 228274_at    | SDSL     | serine dehydratase-like                                                                                          |
| 202375_at    | SEC24D   | SEC24 family, member D ( <i>S. cerevisiae</i> )                                                                  |
| 208942_s_at  | SEC62    | SEC62 homolog ( <i>S. cerevisiae</i> )                                                                           |
| 202061_s_at  | SEL1L    | sel-1 suppressor of lin-12-like ( <i>C. elegans</i> )                                                            |
| 214433_s_at  | SELENBP1 | selenium binding protein 1                                                                                       |
| 219194_at    | SEMA4G   | sema domain, immunoglobulin domain (Ig), transmembrane domain (TM) and short cytoplasmic domain, (semaphorin) 4G |
| 215028_at    | SEMA6A   | sema domain, transmembrane domain (TM), and cytoplasmic domain, (semaphorin) 6A                                  |
| 230071_at    | SEPT11   | septin 11                                                                                                        |
| 1559038_at   | SEPT2    | septin 2                                                                                                         |
| 224625_x_at  | SERF2    | small EDRK-rich factor 2                                                                                         |
| 202833_s_at  | SERPINA1 | serpin peptidase inhibitor, clade A (alpha-1 antitrypsin), member 1                                              |
| 239213_at    | SERPINB1 | serpin peptidase inhibitor, clade B (ovalbumin), member 1                                                        |
| 229674_at    | SERTAD4  | SERTA domain containing 4                                                                                        |
| 223196_s_at  | SESN2    | sestrin 2                                                                                                        |
| 227478_at    | SETBP1   | SET binding protein 1                                                                                            |

|             |            |                                                                                          |
|-------------|------------|------------------------------------------------------------------------------------------|
| 212465_at   | SETD3      | SET domain containing 3                                                                  |
| 33323_r_at  | SFN        | stratifin                                                                                |
| 221768_at   | SFPQ       | Splicing factor proline/glutamine-rich (polypyrimidine tract binding protein associated) |
| 235611_at   | SFRS12     | splicing factor, arginine/serine-rich 12                                                 |
| 222310_at   | SFRS15     | splicing factor, arginine/serine-rich 15                                                 |
| 230375_at   | SFRS18     | splicing factor, arginine/serine-rich 18                                                 |
| 228760_at   | SFRS2B     | splicing factor, arginine/serine-rich 2B                                                 |
| 232597_x_at | SFRS2IP    | splicing factor, arginine/serine-rich 2, interacting protein                             |
| 242837_at   | SFRS4      | Splicing factor, arginine/serine-rich 4                                                  |
| 203380_x_at | SFRS5      | splicing factor, arginine/serine-rich 5                                                  |
| 213649_at   | SFRS7      | splicing factor, arginine/serine-rich 7, 35kDa                                           |
| 218835_at   | SFTPA2     | surfactant protein A2                                                                    |
| 213936_x_at | SFTPB      | surfactant protein B                                                                     |
| 225913_at   | SGK269     | NKF3 kinase family member                                                                |
| 223391_at   | SGPP1      | sphingosine-1-phosphate phosphatase 1                                                    |
| 244780_at   | SGPP2      | sphingosine-1-phosphate phosphatase 2                                                    |
| 230287_at   | SGSM1      | small G protein signaling modulator 1                                                    |
| 214779_s_at | SGSM3      | small G protein signaling modulator 3                                                    |
| 225354_s_at | SH3BGRL2   | SH3 domain binding glutamic acid-rich protein like 2                                     |
| 221269_s_at | SH3BGRL3   | SH3 domain binding glutamic acid-rich protein like 3                                     |
| 225589_at   | SH3RF1     | SH3 domain containing ring finger 1                                                      |
| 243582_at   | SH3RF2     | SH3 domain containing ring finger 2                                                      |
| 228400_at   | SHROOM3    | shroom family member 3                                                                   |
| 206664_at   | SI         | sucrase-isomaltase (alpha-glucosidase)                                                   |
| 224391_s_at | SIAE       | sialic acid acetyltransferase                                                            |
| 219734_at   | SIDT1      | SID1 transmembrane family, member 1                                                      |
| 218765_at   | SIDT2      | SID1 transmembrane family, member 2                                                      |
| 1563455_at  | SIK3       | SIK family kinase 3                                                                      |
| 233587_s_at | SIPA1L2    | signal-induced proliferation-associated 1 like 2                                         |
| 213600_at   | SIPA1L3    | signal-induced proliferation-associated 1 like 3                                         |
| 235143_at   | SLC10A7    | solute carrier family 10 (sodium/bile acid cotransporter family), member 7               |
| 239805_at   | SLC13A2    | solute carrier family 13 (sodium-dependent dicarboxylate transporter), member 2          |
| 207057_at   | SLC16A7    | solute carrier family 16, member 7 (monocarboxylic acid transporter 2)                   |
| 227506_at   | SLC16A9    | solute carrier family 16, member 9 (monocarboxylic acid transporter 9)                   |
| 207074_s_at | SLC18A1    | solute carrier family 18 (vesicular monoamine), member 1                                 |
| 204981_at   | SLC22A18   | solute carrier family 22, member 18                                                      |
| 206097_at   | SLC22A18AS | solute carrier family 22 (organic cation transporter), member 18 antisense               |
| 223194_s_at | SLC22A23   | solute carrier family 22, member 23                                                      |
| 242578_x_at | SLC22A3    | Solute carrier family 22 (extraneuronal monoamine transporter), member 3                 |
| 209003_at   | SLC25A11   | solute carrier family 25 (mitochondrial carrier; oxoglutarate carrier), member 11        |
| 210686_x_at | SLC25A16   | solute carrier family 25 (mitochondrial carrier; Graves disease autoantigen), member 16  |
| 203658_at   | SLC25A20   | solute carrier family 25 (carnitine/acylcarnitine translocase), member 20                |
| 225306_s_at | SLC25A29   | solute carrier family 25, member 29                                                      |
| 222529_at   | SLC25A37   | solute carrier family 25, member 37                                                      |
| 205097_at   | SLC26A2    | solute carrier family 26 (sulfate transporter), member 2                                 |
| 222217_s_at | SLC27A3    | solute carrier family 27 (fatty acid transporter), member 3                              |

|              |                                       |                                                                                                                                |
|--------------|---------------------------------------|--------------------------------------------------------------------------------------------------------------------------------|
| 207249_s_at  | SLC28A2                               | solute carrier family 28 (sodium-coupled nucleoside transporter), member 2                                                     |
| 221024_s_at  | SLC2A10                               | solute carrier family 2 (facilitated glucose transporter), member 10                                                           |
| 227176_at    | SLC2A13                               | solute carrier family 2 (facilitated glucose transporter), member 13                                                           |
| 203306_s_at  | SLC35A1                               | solute carrier family 35 (CMP-sialic acid transporter), member A1                                                              |
| 209865_at    | SLC35A3                               | solute carrier family 35 (UDP-N-acetylglucosamine (UDP-GlcNAc) transporter), member A3                                         |
| 231437_at    | SLC35D2                               | solute carrier family 35, member D2                                                                                            |
| 220796_x_at  | SLC35E1                               | solute carrier family 35, member E1                                                                                            |
| 213119_at    | SLC36A1                               | solute carrier family 36 (proton/amino acid symporter), member 1                                                               |
| 234978_at    | SLC36A4                               | solute carrier family 36 (proton/amino acid symporter), member 4                                                               |
| 218928_s_at  | SLC37A1                               | solute carrier family 37 (glycerol-3-phosphate transporter), member 1                                                          |
| 202667_s_at  | SLC39A7                               | solute carrier family 39 (zinc transporter), member 7                                                                          |
| 223798_at    | SLC41A2                               | solute carrier family 41, member 2                                                                                             |
| 228486_at    | SLC44A1                               | solute carrier family 44, member 1                                                                                             |
| 205597_at    | SLC44A4                               | solute carrier family 44, member 4                                                                                             |
| 1554027_a_at | SLC4A4                                | solute carrier family 4, sodium bicarbonate cotransporter, member 4                                                            |
| 209453_at    | SLC9A1                                | solute carrier family 9 (sodium/hydrogen exchanger), member 1                                                                  |
| 211116_at    | SLC9A2                                | solute carrier family 9 (sodium/hydrogen exchanger), member 2                                                                  |
| 235976_at    | SLITRK6                               | SLIT and NTRK-like family, member 6                                                                                            |
| 203021_at    | SLPI                                  | secretory leukocyte peptidase inhibitor                                                                                        |
| 226563_at    | SMAD2                                 | SMAD family member 2                                                                                                           |
| 1565703_at   | SMAD4                                 | SMAD family member 4                                                                                                           |
| 227719_at    | SMAD9                                 | SMAD family member 9                                                                                                           |
| 212927_at    | SMC5                                  | structural maintenance of chromosomes 5                                                                                        |
| 1558747_at   | SMCHD1                                | structural maintenance of chromosomes flexible hinge domain containing 1                                                       |
| 220368_s_at  | SMEK1                                 | SMEK homolog 1, suppressor of mek1 (Dictyostelium)                                                                             |
| 213624_at    | SMPDL3A                               | sphingomyelin phosphodiesterase, acid-like 3A                                                                                  |
| 223773_s_at  | SNHG12                                | small nucleolar RNA host gene 12 (non-protein coding)                                                                          |
| 244669_at    | SNHG5 ///<br>SNORD50A ///<br>SNORD50B | small nucleolar RNA host gene 5 (non-protein coding) /// small nucleolar RNA, C/D box 50A /// small nucleolar RNA, C/D box 50B |
| 228879_at    | SNORD104                              | small nucleolar RNA, C/D box 104                                                                                               |
| 242146_at    | SNRPA1                                | Small nuclear ribonucleoprotein polypeptide A'                                                                                 |
| 222716_s_at  | SNX24                                 | sorting nexin 24                                                                                                               |
| 228479_at    | SOAT1                                 | sterol O-acyltransferase 1                                                                                                     |
| 203373_at    | SOCS2                                 | suppressor of cytokine signaling 2                                                                                             |
| 226465_s_at  | SON                                   | SON DNA binding protein                                                                                                        |
| 213456_at    | SOSTDC1                               | sclerostin domain containing 1                                                                                                 |
| 219109_at    | SPAG16                                | sperm associated antigen 16                                                                                                    |
| 229331_at    | SPATA18                               | spermatogenesis associated 18 homolog (rat)                                                                                    |
| 220192_x_at  | SPDEF                                 | SAM pointed domain containing ets transcription factor                                                                         |
| 230885_at    | SPG7                                  | spastic paraplegia 7 (pure and complicated autosomal recessive)                                                                |
| 232739_at    | SPIB                                  | Spi-B transcription factor (Spi-1/PU.1 related)                                                                                |
| 207214_at    | SPINK4                                | serine peptidase inhibitor, Kazal type 4                                                                                       |
| 205185_at    | SPINK5                                | serine peptidase inhibitor, Kazal type 5                                                                                       |
| 213994_s_at  | SPON1                                 | spondin 1, extracellular matrix protein                                                                                        |
| 226353_at    | SPPL2A                                | signal peptide peptidase-like 2A                                                                                               |
| 225095_at    | SPTLC2                                | Serine palmitoyltransferase, long chain base subunit 2                                                                         |
| 217995_at    | SQRDL                                 | sulfide quinone reductase-like (yeast)                                                                                         |
| 242748_at    | SREBF2                                | sterol regulatory element binding transcription factor 2                                                                       |
| 227484_at    | SRGAP1                                | SLIT-ROBO Rho GTPase activating protein 1                                                                                      |

|             |                        |                                                                                                                                                |
|-------------|------------------------|------------------------------------------------------------------------------------------------------------------------------------------------|
| 208610_s_at | SRRM2                  | serine/arginine repetitive matrix 2                                                                                                            |
| 203787_at   | SSBP2                  | single-stranded DNA binding protein 2                                                                                                          |
| 213921_at   | SST                    | somatostatin                                                                                                                                   |
| 235591_at   | SSTR1                  | somatostatin receptor 1                                                                                                                        |
| 226229_s_at | SSU72                  | SSU72 RNA polymerase II CTD phosphatase homolog ( <i>S. cerevisiae</i> )                                                                       |
| 203759_at   | ST3GAL4                | ST3 beta-galactoside alpha-2,3-sialyltransferase 4                                                                                             |
| 228821_at   | ST6GAL2                | ST6 beta-galactosamide alpha-2,6-sialyltransferase 2                                                                                           |
| 227725_at   | ST6GALNAC1             | ST6 (alpha-N-acetyl-neuraminy-2,3-beta-galactosyl-1,3)-N-acetylgalactosaminide alpha-2,6-sialyltransferase 1                                   |
| 222571_at   | ST6GALNAC6             | ST6 (alpha-N-acetyl-neuraminy-2,3-beta-galactosyl-1,3)-N-acetylgalactosaminide alpha-2,6-sialyltransferase 6                                   |
| 221610_s_at | STAP2                  | signal transducing adaptor family member 2                                                                                                     |
| 223103_at   | STARD10                | StAR-related lipid transfer (START) domain containing 10                                                                                       |
| 209478_at   | STRA13                 | stimulated by retinoic acid 13 homolog (mouse)                                                                                                 |
| 229513_at   | STRBP                  | spermatid perinuclear RNA binding protein                                                                                                      |
| 238303_at   | STT3B                  | STT3, subunit of the oligosaccharyltransferase complex, homolog B ( <i>S. cerevisiae</i> )                                                     |
| 212111_at   | STX12                  | syntaxin 12                                                                                                                                    |
| 226794_at   | STXBP5                 | syntaxin binding protein 5 (tomosyn)                                                                                                           |
| 220030_at   | STYK1                  | serine/threonine/tyrosine kinase 1                                                                                                             |
| 221696_s_at | STYK1                  | serine/threonine/tyrosine kinase 1                                                                                                             |
| 215772_x_at | SUCLG2                 | succinate-CoA ligase, GDP-forming, beta subunit                                                                                                |
| 224974_at   | SUDS3                  | suppressor of defective silencing 3 homolog ( <i>S. cerevisiae</i> )                                                                           |
| 215299_x_at | SULT1A1                | sulfotransferase family, cytosolic, 1A, phenol-preferring, member 1                                                                            |
| 211385_x_at | SULT1A2                | sulfotransferase family, cytosolic, 1A, phenol-preferring, member 2                                                                            |
| 210580_x_at | SULT1A3 ///<br>SULT1A4 | sulfotransferase family, cytosolic, 1A, phenol-preferring, member 3 ///<br>sulfotransferase family, cytosolic, 1A, phenol-preferring, member 4 |
| 207601_at   | SULT1B1                | sulfotransferase family, cytosolic, 1B, member 1                                                                                               |
| 226850_at   | SUMF1                  | sulfatase modifying factor 1                                                                                                                   |
| 217704_x_at | SUZ12P                 | Suppressor of zeste 12 homolog pseudogene                                                                                                      |
| 202565_s_at | SVIL                   | supervillin                                                                                                                                    |
| 1554595_at  | SYMPK                  | symplekin                                                                                                                                      |
| 221276_s_at | SYNC                   | syncoilin, intermediate filament protein                                                                                                       |
| 202761_s_at | SYNE2                  | spectrin repeat containing, nuclear envelope 2                                                                                                 |
| 219156_at   | SYNJ2BP                | synaptojanin 2 binding protein                                                                                                                 |
| 227274_at   | SYNJ2BP                | synaptojanin 2 binding protein                                                                                                                 |
| 226086_at   | SYT13                  | synaptotagmin XIII                                                                                                                             |
| 205613_at   | SYT17                  | synaptotagmin XVII                                                                                                                             |
| 225496_s_at | SYTL2                  | synaptotagmin-like 2                                                                                                                           |
| 227703_s_at | SYTL4                  | synaptotagmin-like 4                                                                                                                           |
| 242093_at   | SYTL5                  | synaptotagmin-like 5                                                                                                                           |
| 236248_x_at | TADA2B                 | transcriptional adaptor 2B                                                                                                                     |
| 203938_s_at | TAF1C                  | TATA box binding protein (TBP)-associated factor, RNA polymerase I, C, 110kDa                                                                  |
| 218750_at   | TAF1D                  | TATA box binding protein (TBP)-associated factor, RNA polymerase I, D, 41kDa                                                                   |
| 226735_at   | TAPT1                  | transmembrane anterior posterior transformation 1                                                                                              |
| 226318_at   | TBRG1                  | transforming growth factor beta regulator 1                                                                                                    |
| 242701_at   | TBRG1                  | transforming growth factor beta regulator 1                                                                                                    |
| 234970_at   | TC2N                   | tandem C2 domains, nuclear                                                                                                                     |
| 226388_at   | TCEA3                  | transcription elongation factor A (SII), 3                                                                                                     |
| 227279_at   | TCEAL3                 | transcription elongation factor A (SII)-like 3                                                                                                 |
| 213311_s_at | TCF25                  | transcription factor 25 (basic helix-loop-helix)                                                                                               |

|              |           |                                                                                                    |
|--------------|-----------|----------------------------------------------------------------------------------------------------|
| 212761_at    | TCF7L2    | transcription factor 7-like 2 (T-cell specific, HMG-box)                                           |
| 203742_s_at  | TDG       | thymine-DNA glycosylase                                                                            |
| 227580_s_at  | TECPR1    | tectonin beta-propeller repeat containing 1                                                        |
| 228670_at    | TEP1      | telomerase-associated protein 1                                                                    |
| 227624_at    | TET2      | tet oncogene family member 2                                                                       |
| 229341_at    | TFCP2L1   | transcription factor CP2-like 1                                                                    |
| 204623_at    | TFF3      | trefoil factor 3 (intestinal)                                                                      |
| 235086_at    | THBS1     | thrombospondin 1                                                                                   |
| 228716_at    | THRB      | thyroid hormone receptor, beta (erythroblastic leukemia viral (v-erb-a) oncogene homolog 2, avian) |
| 222835_at    | THSD4     | thrombospondin, type I, domain containing 4                                                        |
| 242377_x_at  | THUMPD3   | THUMP domain containing 3                                                                          |
| 201449_at    | TIA1      | TIA1 cytotoxic granule-associated RNA binding protein                                              |
| 218357_s_at  | TIMM8B    | translocase of inner mitochondrial membrane 8 homolog B (yeast)                                    |
| 214773_x_at  | TIPRL     | TIP41, TOR signaling pathway regulator-like ( <i>S. cerevisiae</i> )                               |
| 35148_at     | TJP3      | tight junction protein 3 (zona occludens 3)                                                        |
| 1557275_a_at | TLCD2     | TLC domain containing 2                                                                            |
| 203222_s_at  | TLE1      | transducin-like enhancer of split 1 (E(sp1) homolog, <i>Drosophila</i> )                           |
| 212703_at    | TLN2      | talin 2                                                                                            |
| 217758_s_at  | TM9SF3    | transmembrane 9 superfamily member 3                                                               |
| 219206_x_at  | TMBIM4    | transmembrane BAX inhibitor motif containing 4                                                     |
| 235146_at    | TMCC3     | transmembrane and coiled-coil domain family 3                                                      |
| 238886_at    | TMED10    | transmembrane emp24-like trafficking protein 10 (yeast)                                            |
| 205812_s_at  | TMED9     | transmembrane emp24 protein transport domain containing 9                                          |
| 224321_at    | TMEFF2    | transmembrane protein with EGF-like and two follistatin-like domains 2                             |
| 1552302_at   | TMEM106A  | transmembrane protein 106A                                                                         |
| 239831_at    | TMEM106C  | Transmembrane protein 106C                                                                         |
| 228775_at    | TMEM111   | transmembrane protein 111                                                                          |
| 225822_at    | TMEM125   | transmembrane protein 125                                                                          |
| 225588_s_at  | TMEM129   | transmembrane protein 129                                                                          |
| 225568_at    | TMEM141   | transmembrane protein 141                                                                          |
| 238783_at    | TMEM161B  | transmembrane protein 161B                                                                         |
| 218962_s_at  | TMEM168   | transmembrane protein 168                                                                          |
| 240770_at    | TMEM171   | transmembrane protein 171                                                                          |
| 229693_at    | TMEM220   | transmembrane protein 220                                                                          |
| 213285_at    | TMEM30B   | transmembrane protein 30B                                                                          |
| 212622_at    | TMEM41B   | transmembrane protein 41B                                                                          |
| 228054_at    | TMEM44    | transmembrane protein 44                                                                           |
| 230323_s_at  | TMEM45B   | transmembrane protein 45B                                                                          |
| 225182_at    | TMEM50B   | transmembrane protein 50B                                                                          |
| 225536_at    | TMEM54    | transmembrane protein 54                                                                           |
| 200620_at    | TMEM59    | transmembrane protein 59                                                                           |
| 1558323_at   | TMEM72    | transmembrane protein 72                                                                           |
| 225412_at    | TMEM87B   | transmembrane protein 87B                                                                          |
| 218065_s_at  | TMEM9B    | TMEM9 domain family, member B                                                                      |
| 226553_at    | TMPRSS2   | transmembrane protease, serine 2                                                                   |
| 217733_s_at  | TMSB10    | thymosin beta 10                                                                                   |
| 201175_at    | TMX2      | thioredoxin-related transmembrane protein 2                                                        |
| 227345_at    | TNFRSF10D | tumor necrosis factor receptor superfamily, member 10d, decoy with truncated death domain          |
| 207037_at    | TNFRSF11A | tumor necrosis factor receptor superfamily, member 11a, NFkB activator                             |

|              |                                |                                                                                       |
|--------------|--------------------------------|---------------------------------------------------------------------------------------|
| 202687_s_at  | TNFSF10                        | tumor necrosis factor (ligand) superfamily, member 10                                 |
| 209499_x_at  | TNFSF12-TNFSF13<br>/// TNFSF13 | TNFSF12-TNFSF13 readthrough /// tumor necrosis factor (ligand) superfamily, member 13 |
| 210314_x_at  | TNFSF13                        | tumor necrosis factor (ligand) superfamily, member 13                                 |
| 213107_at    | TNIK                           | TRAF2 and NCK interacting kinase                                                      |
| 1558142_at   | TNRC6B                         | trinucleotide repeat containing 6B                                                    |
| 226059_at    | TOMM40L                        | translocase of outer mitochondrial membrane 40 homolog (yeast)-like                   |
| 204529_s_at  | TOX                            | thymocyte selection-associated high mobility group box                                |
| 232097_at    | TOX4                           | TOX high mobility group box family member 4                                           |
| 203421_at    | TP53I11                        | tumor protein p53 inducible protein 11                                                |
| 210609_s_at  | TP53I3                         | tumor protein p53 inducible protein 3                                                 |
| 224836_at    | TP53INP2                       | tumor protein p53 inducible nuclear protein 2                                         |
| 203476_at    | TPBG                           | trophoblast glycoprotein                                                              |
| 201689_s_at  | TPD52                          | tumor protein D52                                                                     |
| 214601_at    | TPH1                           | tryptophan hydroxylase 1                                                              |
| 238688_at    | TPM1                           | Tropomyosin 1 (alpha)                                                                 |
| 229574_at    | TRA2A                          | transformer 2 alpha homolog (Drosophila)                                              |
| 215411_s_at  | TRAF3IP2                       | TRAF3 interacting protein 2                                                           |
| 202124_s_at  | TRAK2                          | trafficking protein, kinesin binding 2                                                |
| 215269_at    | TRAPPC10                       | trafficking protein particle complex 10                                               |
| 219736_at    | TRIM36                         | tripartite motif-containing 36                                                        |
| 203567_s_at  | TRIM38                         | tripartite motif-containing 38                                                        |
| 231403_at    | TRIO                           | Triple functional domain (PTPRF interacting)                                          |
| 219360_s_at  | TRPM4                          | transient receptor potential cation channel, subfamily M, member 4                    |
| 224412_s_at  | TRPM6                          | transient receptor potential cation channel, subfamily M, member 6                    |
| 209114_at    | TSPAN1                         | tetraspanin 1                                                                         |
| 217979_at    | TSPAN13                        | tetraspanin 13                                                                        |
| 202242_at    | TSPAN7                         | tetraspanin 7                                                                         |
| 203824_at    | TSPAN8                         | tetraspanin 8                                                                         |
| 218155_x_at  | TSR1                           | TSR1, 20S rRNA accumulation, homolog (S. cerevisiae)                                  |
| 209605_at    | TST                            | thiosulfate sulfurtransferase (rhodanese)                                             |
| 219481_at    | TTC13                          | tetratricopeptide repeat domain 13                                                    |
| 225178_at    | TTC14                          | tetratricopeptide repeat domain 14                                                    |
| 235651_at    | TTC22                          | tetratricopeptide repeat domain 22                                                    |
| 210652_s_at  | TTC39A                         | tetratricopeptide repeat domain 39A                                                   |
| 230924_at    | TTLL6                          | tubulin tyrosine ligase-like family, member 6                                         |
| 227388_at    | TUSC1                          | tumor suppressor candidate 1                                                          |
| 213423_x_at  | TUSC3                          | tumor suppressor candidate 3                                                          |
| 223325_at    | TXNDC11                        | thioredoxin domain containing 11                                                      |
| 201008_s_at  | TXNIP                          | thioredoxin interacting protein                                                       |
| 231904_at    | U2AF1                          | U2 small nuclear RNA auxiliary factor 1                                               |
| 236715_x_at  | UACA                           | uveal autoantigen with coiled-coil domains and ankyrin repeats                        |
| 1294_at      | UBA7                           | ubiquitin-like modifier activating enzyme 7                                           |
| 240383_at    | UBE2D3                         | ubiquitin-conjugating enzyme E2D 3 (UBC4/5 homolog, yeast)                            |
| 1557053_s_at | UBE2G2                         | ubiquitin-conjugating enzyme E2G 2 (UBC7 homolog, yeast)                              |
| 222252_x_at  | UBQLN4                         | ubiquilin 4                                                                           |
| 235327_x_at  | UBXN2A                         | UBX domain protein 2A                                                                 |
| 203343_at    | UGDH                           | UDP-glucose 6-dehydrogenase                                                           |
| 232180_at    | UGP2                           | UDP-glucose pyrophosphorylase 2                                                       |

|                     |                                                                                                                   |                                                                                                                                                                                                                                                                                                                                                                                                                                                                                                                                                       |
|---------------------|-------------------------------------------------------------------------------------------------------------------|-------------------------------------------------------------------------------------------------------------------------------------------------------------------------------------------------------------------------------------------------------------------------------------------------------------------------------------------------------------------------------------------------------------------------------------------------------------------------------------------------------------------------------------------------------|
| <b>206094_x_at</b>  | UGT1A1 ///<br>UGT1A10 ///<br>UGT1A3 /// UGT1A4<br>/// UGT1A5 ///<br>UGT1A6 /// UGT1A7<br>/// UGT1A8 ///<br>UGT1A9 | UDP glucuronosyltransferase 1 family, polypeptide A1 /// UDP<br>glucuronosyltransferase 1 family, polypeptide A10 /// UDP<br>glucuronosyltransferase 1 family, polypeptide A3 /// UDP<br>glucuronosyltransferase 1 family, polypeptide A4 /// UDP<br>glucuronosyltransferase 1 family, polypeptide A5 /// UDP<br>glucuronosyltransferase 1 family, polypeptide A6 /// UDP<br>glucuronosyltransferase 1 family, polypeptide A7 /// UDP<br>glucuronosyltransferase 1 family, polypeptide A8 /// UDP<br>glucuronosyltransferase 1 family, polypeptide A9 |
| <b>219948_x_at</b>  | UGT2A3                                                                                                            | UDP glucuronosyltransferase 2 family, polypeptide A3                                                                                                                                                                                                                                                                                                                                                                                                                                                                                                  |
| <b>207392_x_at</b>  | UGT2B15                                                                                                           | UDP glucuronosyltransferase 2 family, polypeptide B15                                                                                                                                                                                                                                                                                                                                                                                                                                                                                                 |
| <b>207245_at</b>    | UGT2B17                                                                                                           | UDP glucuronosyltransferase 2 family, polypeptide B17                                                                                                                                                                                                                                                                                                                                                                                                                                                                                                 |
| <b>211682_x_at</b>  | UGT2B28                                                                                                           | UDP glucuronosyltransferase 2 family, polypeptide B28                                                                                                                                                                                                                                                                                                                                                                                                                                                                                                 |
| <b>202893_at</b>    | UNC13B                                                                                                            | unc-13 homolog B ( <i>C. elegans</i> )                                                                                                                                                                                                                                                                                                                                                                                                                                                                                                                |
| <b>226899_at</b>    | UNC5B                                                                                                             | unc-5 homolog B ( <i>C. elegans</i> )                                                                                                                                                                                                                                                                                                                                                                                                                                                                                                                 |
| <b>218190_s_at</b>  | UQCR10                                                                                                            | ubiquinol-cytochrome c reductase, complex III subunit X                                                                                                                                                                                                                                                                                                                                                                                                                                                                                               |
| <b>221173_at</b>    | USH1C                                                                                                             | Usher syndrome 1C (autosomal recessive, severe)                                                                                                                                                                                                                                                                                                                                                                                                                                                                                                       |
| <b>233595_at</b>    | USP34                                                                                                             | ubiquitin specific peptidase 34                                                                                                                                                                                                                                                                                                                                                                                                                                                                                                                       |
| <b>237439_at</b>    | USP43                                                                                                             | ubiquitin specific peptidase 43                                                                                                                                                                                                                                                                                                                                                                                                                                                                                                                       |
| <b>223701_s_at</b>  | USP47                                                                                                             | ubiquitin specific peptidase 47                                                                                                                                                                                                                                                                                                                                                                                                                                                                                                                       |
| <b>220079_s_at</b>  | USP48                                                                                                             | ubiquitin specific peptidase 48                                                                                                                                                                                                                                                                                                                                                                                                                                                                                                                       |
| <b>208780_x_at</b>  | VAPA                                                                                                              | VAMP (vesicle-associated membrane protein)-associated protein A,<br>33kDa                                                                                                                                                                                                                                                                                                                                                                                                                                                                             |
| <b>202205_at</b>    | VASP                                                                                                              | vasodilator-stimulated phosphoprotein                                                                                                                                                                                                                                                                                                                                                                                                                                                                                                                 |
| <b>204254_s_at</b>  | VDR                                                                                                               | vitamin D (1,25- dihydroxyvitamin D3) receptor                                                                                                                                                                                                                                                                                                                                                                                                                                                                                                        |
| <b>209950_s_at</b>  | VILL                                                                                                              | villin-like                                                                                                                                                                                                                                                                                                                                                                                                                                                                                                                                           |
| <b>236254_at</b>    | VPS13B                                                                                                            | vacuolar protein sorting 13 homolog B (yeast)                                                                                                                                                                                                                                                                                                                                                                                                                                                                                                         |
| <b>212323_s_at</b>  | VPS13D                                                                                                            | vacuolar protein sorting 13 homolog D ( <i>S. cerevisiae</i> )                                                                                                                                                                                                                                                                                                                                                                                                                                                                                        |
| <b>221704_s_at</b>  | VPS37B                                                                                                            | vacuolar protein sorting 37 homolog B ( <i>S. cerevisiae</i> )                                                                                                                                                                                                                                                                                                                                                                                                                                                                                        |
| <b>218171_at</b>    | VPS4B                                                                                                             | vacuolar protein sorting 4 homolog B ( <i>S. cerevisiae</i> )                                                                                                                                                                                                                                                                                                                                                                                                                                                                                         |
| <b>226485_at</b>    | VSIG10                                                                                                            | V-set and immunoglobulin domain containing 10                                                                                                                                                                                                                                                                                                                                                                                                                                                                                                         |
| <b>228232_s_at</b>  | VSIG2                                                                                                             | V-set and immunoglobulin domain containing 2                                                                                                                                                                                                                                                                                                                                                                                                                                                                                                          |
| <b>1552536_at</b>   | VTI1A                                                                                                             | vesicle transport through interaction with t-SNAREs homolog 1A<br>(yeast)                                                                                                                                                                                                                                                                                                                                                                                                                                                                             |
| <b>205011_at</b>    | VWA5A                                                                                                             | von Willebrand factor A domain containing 5A                                                                                                                                                                                                                                                                                                                                                                                                                                                                                                          |
| <b>233929_x_at</b>  | WASH3P                                                                                                            | WAS protein family homolog 3 pseudogene                                                                                                                                                                                                                                                                                                                                                                                                                                                                                                               |
| <b>240282_at</b>    | WDR1                                                                                                              | WD repeat domain 1                                                                                                                                                                                                                                                                                                                                                                                                                                                                                                                                    |
| <b>229694_at</b>    | WDR11                                                                                                             | WD repeat domain 11                                                                                                                                                                                                                                                                                                                                                                                                                                                                                                                                   |
| <b>212880_at</b>    | WDR7                                                                                                              | WD repeat domain 7                                                                                                                                                                                                                                                                                                                                                                                                                                                                                                                                    |
| <b>238650_x_at</b>  | WDR89                                                                                                             | WD repeat domain 89                                                                                                                                                                                                                                                                                                                                                                                                                                                                                                                                   |
| <b>203892_at</b>    | WFDC2                                                                                                             | WAP four-disulfide core domain 2                                                                                                                                                                                                                                                                                                                                                                                                                                                                                                                      |
| <b>224465_s_at</b>  | WIBG                                                                                                              | within bgcn homolog ( <i>Drosophila</i> )                                                                                                                                                                                                                                                                                                                                                                                                                                                                                                             |
| <b>229158_at</b>    | WNK4                                                                                                              | WNK lysine deficient protein kinase 4                                                                                                                                                                                                                                                                                                                                                                                                                                                                                                                 |
| <b>201294_s_at</b>  | WSB1                                                                                                              | WD repeat and SOCS box-containing 1                                                                                                                                                                                                                                                                                                                                                                                                                                                                                                                   |
| <b>213155_at</b>    | WSCD1                                                                                                             | WSC domain containing 1                                                                                                                                                                                                                                                                                                                                                                                                                                                                                                                               |
| <b>241994_at</b>    | XDH                                                                                                               | xanthine dehydrogenase                                                                                                                                                                                                                                                                                                                                                                                                                                                                                                                                |
| <b>209045_at</b>    | XPNPEP1                                                                                                           | X-prolyl aminopeptidase (aminopeptidase P) 1, soluble                                                                                                                                                                                                                                                                                                                                                                                                                                                                                                 |
| <b>240168_at</b>    | XPO7                                                                                                              | exportin 7                                                                                                                                                                                                                                                                                                                                                                                                                                                                                                                                            |
| <b>207598_x_at</b>  | XRCC2                                                                                                             | X-ray repair complementing defective repair in Chinese hamster cells<br>2                                                                                                                                                                                                                                                                                                                                                                                                                                                                             |
| <b>227020_at</b>    | YPEL2                                                                                                             | yippee-like 2 ( <i>Drosophila</i> )                                                                                                                                                                                                                                                                                                                                                                                                                                                                                                                   |
| <b>232516_x_at</b>  | YY1AP1                                                                                                            | YY1 associated protein 1                                                                                                                                                                                                                                                                                                                                                                                                                                                                                                                              |
| <b>1554239_s_at</b> | ZADH2                                                                                                             | zinc binding alcohol dehydrogenase domain containing 2                                                                                                                                                                                                                                                                                                                                                                                                                                                                                                |
| <b>243648_at</b>    | ZBED6                                                                                                             | zinc finger, BED domain containing 6                                                                                                                                                                                                                                                                                                                                                                                                                                                                                                                  |

|             |         |                                              |
|-------------|---------|----------------------------------------------|
| 226554_at   | ZBTB7A  | zinc finger and BTB domain containing 7A     |
| 227782_at   | ZBTB7C  | zinc finger and BTB domain containing 7C     |
| 231899_at   | ZC3H12C | zinc finger CCCH-type containing 12C         |
| 213063_at   | ZC3H14  | zinc finger CCCH-type containing 14          |
| 206169_x_at | ZC3H7B  | zinc finger CCCH-type containing 7B          |
| 219062_s_at | ZCCHC2  | zinc finger, CCHC domain containing 2        |
| 236243_at   | ZCCHC6  | Zinc finger, CCHC domain containing 6        |
| 230332_at   | ZCCHC7  | Zinc finger, CCHC domain containing 7        |
| 232440_at   | ZDHHC13 | Zinc finger, DHHC-type containing 13         |
| 222730_s_at | ZDHHC2  | zinc finger, DHHC-type containing 2          |
| 218606_at   | ZDHHC7  | zinc finger, DHHC-type containing 7          |
| 222186_at   | ZFAND6  | Zinc finger, AN1-type domain 6               |
| 226137_at   | ZFHX3   | zinc finger homeobox 3                       |
| 235728_at   | ZFP3    | zinc finger protein 3 homolog (mouse)        |
| 224631_at   | ZFP91   | zinc finger protein 91 homolog (mouse)       |
| 223387_at   | ZFYVE1  | zinc finger, FYVE domain containing 1        |
| 224445_s_at | ZFYVE21 | zinc finger, FYVE domain containing 21       |
| 214142_at   | ZG16    | zymogen granule protein 16 homolog (rat)     |
| 1557384_at  | ZNF131  | Zinc finger protein 131                      |
| 214715_x_at | ZNF160  | zinc finger protein 160                      |
| 231848_x_at | ZNF207  | zinc finger protein 207                      |
| 219603_s_at | ZNF226  | zinc finger protein 226                      |
| 233399_x_at | ZNF252  | Zinc finger protein 252                      |
| 1555192_at  | ZNF277  | zinc finger protein 277                      |
| 228393_s_at | ZNF302  | zinc finger protein 302                      |
| 215359_x_at | ZNF44   | zinc finger protein 44                       |
| 1558486_at  | ZNF493  | zinc finger protein 493                      |
| 244132_x_at | ZNF518A | Zinc finger protein 518A                     |
| 208137_x_at | ZNF611  | zinc finger protein 611                      |
| 215978_x_at | ZNF721  | zinc finger protein 721                      |
| 235231_at   | ZNF789  | zinc finger protein 789                      |
| 243618_s_at | ZNF827  | Zinc finger protein 827                      |
| 206059_at   | ZNF91   | zinc finger protein 91                       |
| 223016_x_at | ZRANB2  | zinc finger, RAN-binding domain containing 2 |
| 212601_at   | ZZEF1   | zinc finger, ZZ-type with EF-hand domain 1   |
| 226208_at   | ZSWIM6  | zinc finger, SWIM-type containing 6          |

**Supplementary Table 1.** In tumorous epithelia, 2533 downregulated transcripts were identified which belong to 1509 known genes.
