# Supplementary material for: Genome-Wide Screening of Genes Regulated by DNA Methylation in Colon Cancer Development
Source: PubMed Central journal article supplement (PMC3462205; doi:10.1371/journal.pone.0046215), 2012-10-01
Supplement: pone.0046215.s006.pdf [file pone.0046215.s006.pdf]

**Supplementary Table S2**

## Putative methylation regulated transcripts in LCM CRC samples

| Probe Set ID | Gene Symbol | Gene Title                                                                                     |
|--------------|-------------|------------------------------------------------------------------------------------------------|
| 222688_at    | ACER3       | alkaline ceramidase 3                                                                          |
| 1557820_at   | AFG3L2      | AFG3 ATPase family gene 3-like 2 (yeast)                                                       |
| 224667_x_at  | ANAPC16     | anaphase promoting complex subunit 16                                                          |
| 202888_s_at  | ANPEP       | alanyl (membrane) aminopeptidase                                                               |
| 200602_at    | APP         | amyloid beta (A4) precursor protein                                                            |
| 1555962_at   | B3GNT7      | UDP-GlcNAc:betaGal beta-1,3-N-acetylglucosaminyltransferase 7                                  |
| 205263_at    | BCL10       | B-cell CLL/lymphoma 10                                                                         |
| 227736_at    | C10orf99    | chromosome 10 open reading frame 99                                                            |
| 229520_s_at  | C14orf118   | chromosome 14 open reading frame 118                                                           |
| 223484_at    | C15orf48    | chromosome 15 open reading frame 48                                                            |
| 224458_at    | C9orf125    | chromosome 9 open reading frame 125                                                            |
| 214315_x_at  | CALR        | calreticulin                                                                                   |
| 208683_at    | CAPN2       | calpain 2, (m/II) large subunit                                                                |
| 205789_at    | CD1D        | CD1d molecule                                                                                  |
| 232266_x_at  | CDK13       | Cyclin-dependent kinase 13                                                                     |
| 236313_at    | CDKN2B      | cyclin-dependent kinase inhibitor 2B (p15, inhibits CDK4)                                      |
| 204159_at    | CDKN2C      | cyclin-dependent kinase inhibitor 2C (p18, inhibits CDK4)                                      |
| 205709_s_at  | CDS1        | CDP-diacylglycerol synthase (phosphatidate cytidyltransferase) 1                               |
| 200998_s_at  | CKAP4       | cytoskeleton-associated protein 4                                                              |
| 220026_at    | CLCA4       | chloride channel accessory 4                                                                   |
| 241065_x_at  | CMAS        | Cytidine monophosphate N-acetylneuraminic acid synthetase                                      |
| 234981_x_at  | CMBL        | carboxymethylenebutenolidase homolog (Pseudomonas)                                             |
| 225009_at    | CMTM4       | CKLF-like MARVEL transmembrane domain containing 4                                             |
| 218900_at    | CNNM4       | cyclin M4                                                                                      |
| 205927_s_at  | CTSE        | cathepsin E                                                                                    |
| 244546_at    | CYCS        | cytochrome c, somatic                                                                          |
| 219290_x_at  | DAPP1       | dual adaptor of phosphotyrosine and 3-phosphoinositides                                        |
| 205370_x_at  | DBT         | dihydrolipoamide branched chain transacylase E2                                                |
| 242562_at    | DNAJC24     | DnaJ (Hsp40) homolog, subfamily C, member 24                                                   |
| 227955_s_at  | EFNA5       | ephrin-A5                                                                                      |
| 205222_at    | EHHADH      | enoyl-CoA, hydratase/3-hydroxyacyl CoA dehydrogenase                                           |
| 235645_at    | ESCO1       | establishment of cohesion 1 homolog 1 (S. cerevisiae)                                          |
| 242608_x_at  | FAM161B     | Family with sequence similarity 161, member B                                                  |
| 226062_x_at  | FAM63A      | family with sequence similarity 63, member A                                                   |
| 203698_s_at  | FRZB        | frizzled-related protein                                                                       |
| 211795_s_at  | FYB         | FYN binding protein                                                                            |
| 227405_s_at  | FZD8        | frizzled homolog 8 (Drosophila)                                                                |
| 201722_s_at  | GALNT1      | UDP-N-acetyl-alpha-D-galactosamine:polypeptide N-acetylgalactosaminyltransferase 1 (GalNAc-T1) |
| 206422_at    | GCG         | glucagon                                                                                       |
| 212959_s_at  | GNPTAB      | N-acetylglucosamine-1-phosphate transferase, alpha and beta subunits                           |
| 211040_x_at  | GTSE1       | G-2 and S-phase expressed 1                                                                    |
| 220071_x_at  | HAUS2       | HAUS augmin-like complex, subunit 2                                                            |
| 217845_x_at  | HIGD1A      | HIG1 hypoxia inducible domain family, member 1A                                                |
| 200799_at    | HSPA1A      | heat shock 70kDa protein 1A                                                                    |
| 206502_s_at  | INSM1       | insulinoma-associated 1                                                                        |

|              |                                                                                           |                                                                                                                                                                                                                                                                                                                  |
|--------------|-------------------------------------------------------------------------------------------|------------------------------------------------------------------------------------------------------------------------------------------------------------------------------------------------------------------------------------------------------------------------------------------------------------------|
| 202746_at    | ITM2A                                                                                     | integral membrane protein 2A                                                                                                                                                                                                                                                                                     |
| 1562063_x_at | KIAA1245 ///<br>LOC200030 ///<br>NBPF1 ///<br>NBPF10 ///<br>NBPF11 ///<br>NBPF8 /// NBPF9 | KIAA1245 /// neuroblastoma breakpoint family, member 11-like ///<br>neuroblastoma breakpoint family, member 1 /// neuroblastoma<br>breakpoint family, member 10 /// neuroblastoma breakpoint family,<br>member 11 /// neuroblastoma breakpoint family, member 8 ///<br>neuroblastoma breakpoint family, member 9 |
| 209211_at    | KLF5                                                                                      | Kruppel-like factor 5 (intestinal)                                                                                                                                                                                                                                                                               |
| 213953_at    | KRT20                                                                                     | keratin 20                                                                                                                                                                                                                                                                                                       |
| 200915_x_at  | KTN1                                                                                      | kinectin 1 (kinesin receptor)                                                                                                                                                                                                                                                                                    |
| 214709_s_at  | KTN1                                                                                      | kinectin 1 (kinesin receptor)                                                                                                                                                                                                                                                                                    |
| 235167_at    | LOC100190986                                                                              | hypothetical LOC100190986                                                                                                                                                                                                                                                                                        |
| 232455_x_at  | LOC340085                                                                                 | hypothetical protein LOC340085                                                                                                                                                                                                                                                                                   |
| 242889_x_at  | LOC645431                                                                                 | hypothetical LOC645431                                                                                                                                                                                                                                                                                           |
| 204037_at    | LPAR1                                                                                     | lysophosphatidic acid receptor 1                                                                                                                                                                                                                                                                                 |
| 204674_at    | LRMP                                                                                      | lymphoid-restricted membrane protein                                                                                                                                                                                                                                                                             |
| 220376_at    | LRRC19                                                                                    | leucine rich repeat containing 19                                                                                                                                                                                                                                                                                |
| 211452_x_at  | LRRFIP1                                                                                   | leucine rich repeat (in FLII) interacting protein 1                                                                                                                                                                                                                                                              |
| 209579_s_at  | MBD4                                                                                      | methyl-CpG binding domain protein 4                                                                                                                                                                                                                                                                              |
| 217109_at    | MUC4                                                                                      | mucin 4, cell surface associated                                                                                                                                                                                                                                                                                 |
| 226041_at    | NAPEPLD                                                                                   | N-acyl phosphatidylethanolamine phospholipase D                                                                                                                                                                                                                                                                  |
| 232169_x_at  | NDUFS8                                                                                    | NADH dehydrogenase (ubiquinone) Fe-S protein 8, 23kDa (NADH-<br>coenzyme Q reductase)                                                                                                                                                                                                                            |
| 202149_at    | NEDD9                                                                                     | neural precursor cell expressed, developmentally down-regulated 9                                                                                                                                                                                                                                                |
| 201502_s_at  | NFKBIA                                                                                    | nuclear factor of kappa light polypeptide gene enhancer in B-cells<br>inhibitor, alpha                                                                                                                                                                                                                           |
| 239748_x_at  | OCIAD1                                                                                    | OCIA domain containing 1                                                                                                                                                                                                                                                                                         |
| 206323_x_at  | OPHN1                                                                                     | oligophrenin 1                                                                                                                                                                                                                                                                                                   |
| 1554384_at   | PADI2                                                                                     | peptidyl arginine deiminase, type II                                                                                                                                                                                                                                                                             |
| 242871_at    | PAQR5                                                                                     | progesterin and adipoQ receptor family member V                                                                                                                                                                                                                                                                  |
| 204687_at    | PARM1                                                                                     | prostate androgen-regulated mucin-like protein 1                                                                                                                                                                                                                                                                 |
| 206792_x_at  | PDE4C                                                                                     | phosphodiesterase 4C, cAMP-specific (phosphodiesterase E1 dunce<br>homolog, Drosophila)                                                                                                                                                                                                                          |
| 203131_at    | PDGFRA                                                                                    | platelet-derived growth factor receptor, alpha polypeptide                                                                                                                                                                                                                                                       |
| 215179_x_at  | PGF                                                                                       | Placental growth factor                                                                                                                                                                                                                                                                                          |
| 226147_s_at  | PIGR                                                                                      | polymeric immunoglobulin receptor                                                                                                                                                                                                                                                                                |
| 207109_at    | POU2F3                                                                                    | POU class 2 homeobox 3                                                                                                                                                                                                                                                                                           |
| 219392_x_at  | PRR11                                                                                     | proline rich 11                                                                                                                                                                                                                                                                                                  |
| 232215_x_at  | PRR11                                                                                     | proline rich 11                                                                                                                                                                                                                                                                                                  |
| 238513_at    | PRRG4                                                                                     | Proline rich Gla (G-carboxyglutamic acid) 4 (transmembrane)                                                                                                                                                                                                                                                      |
| 215894_at    | PTGDR                                                                                     | prostaglandin D2 receptor (DP)                                                                                                                                                                                                                                                                                   |
| 221872_at    | RARRES1                                                                                   | retinoic acid receptor responder (tazarotene induced) 1                                                                                                                                                                                                                                                          |
| 215588_x_at  | RIOK3                                                                                     | RIO kinase 3 (yeast)                                                                                                                                                                                                                                                                                             |
| 214041_x_at  | RPL37A                                                                                    | Ribosomal protein L37a                                                                                                                                                                                                                                                                                           |
| 230660_at    | SERTAD4                                                                                   | SERTA domain containing 4                                                                                                                                                                                                                                                                                        |
| 33323_r_at   | SFN                                                                                       | stratifin                                                                                                                                                                                                                                                                                                        |
| 230375_at    | SFRS18                                                                                    | splicing factor, arginine/serine-rich 18                                                                                                                                                                                                                                                                         |
| 218835_at    | SFTPA2                                                                                    | surfactant protein A2                                                                                                                                                                                                                                                                                            |
| 213936_x_at  | SFTPB                                                                                     | surfactant protein B                                                                                                                                                                                                                                                                                             |
| 223391_at    | SGPP1                                                                                     | sphingosine-1-phosphate phosphatase 1                                                                                                                                                                                                                                                                            |
| 242578_x_at  | SLC22A3                                                                                   | Solute carrier family 22 (extraneuronal monoamine transporter),<br>member 3                                                                                                                                                                                                                                      |
| 224959_at    | SLC26A2                                                                                   | solute carrier family 26 (sulfate transporter), member 2                                                                                                                                                                                                                                                         |

|                 |         |                                                                                        |
|-----------------|---------|----------------------------------------------------------------------------------------|
| 226894_at       | SLC35A3 | solute carrier family 35 (UDP-N-acetylglucosamine (UDP-GlcNAc) transporter), member A3 |
| 220796_x_at     | SLC35E1 | solute carrier family 35, member E1                                                    |
| 212569_at       | SMCHD1  | structural maintenance of chromosomes flexible hinge domain containing 1               |
| 232739_at       | SPIB    | Spi-B transcription factor (Spi-1/PU.1 related)                                        |
| 226353_at       | SPPL2A  | signal peptide peptidase-like 2A                                                       |
| 202565_s_at     | SVIL    | supervillin                                                                            |
| 242093_at       | SYTL5   | synaptotagmin-like 5                                                                   |
| 236248_x_at     | TADA2B  | transcriptional adaptor 2B                                                             |
| 212761_at       | TCF7L2  | transcription factor 7-like 2 (T-cell specific, HMG-box)                               |
| 229341_at       | TFCP2L1 | transcription factor CP2-like 1                                                        |
| 242377_x_at     | THUMPD3 | THUMP domain containing 3                                                              |
| 205812_s_at     | TMED9   | transmembrane emp24 protein transport domain containing 9                              |
| 240770_at       | TMEM171 | transmembrane protein 171                                                              |
| 213285_at       | TMEM30B | transmembrane protein 30B                                                              |
| 219736_at       | TRIM36  | tripartite motif-containing 36                                                         |
| 236715_x_at     | UACA    | uveal autoantigen with coiled-coil domains and ankyrin repeats                         |
| 222252_x_at     | UBQLN4  | ubiquilin 4                                                                            |
| 235327_x_at     | UBXN2A  | UBX domain protein 2A                                                                  |
| 207245_at       | UGT2B17 | UDP glucuronosyltransferase 2 family, polypeptide B17                                  |
| 233595_at       | USP34   | ubiquitin specific peptidase 34                                                        |
| 218171_at       | VPS4B   | vacuolar protein sorting 4 homolog B ( <i>S. cerevisiae</i> )                          |
| 232516_x_at     | YY1AP1  | YY1 associated protein 1                                                               |
| 233399_x_at     | ZNF252  | Zinc finger protein 252                                                                |
| 208137_x_at     | ZNF611  | zinc finger protein 611                                                                |
| 215978_x_at     | ZNF721  | zinc finger protein 721                                                                |
| AFFX-hum_alu_at | ---     | ---                                                                                    |
| 1557222_at      | ---     | ---                                                                                    |
| 1557780_at      | ---     | ---                                                                                    |
| 1566887_x_at    | ---     | ---                                                                                    |
| 1569409_x_at    | ---     | ---                                                                                    |
| 207730_x_at     | ---     | ---                                                                                    |
| 208246_x_at     | ---     | ---                                                                                    |
| 210679_x_at     | ---     | ---                                                                                    |
| 214989_x_at     | ---     | ---                                                                                    |
| 215604_x_at     | ---     | ---                                                                                    |
| 215628_x_at     | ---     | ---                                                                                    |
| 216147_at       | ---     | ---                                                                                    |
| 216187_x_at     | ---     | ---                                                                                    |
| 217679_x_at     | ---     | ---                                                                                    |
| 227682_at       | ---     | ---                                                                                    |
| 229157_at       | ---     | ---                                                                                    |
| 229434_at       | ---     | ---                                                                                    |
| 230324_at       | ---     | ---                                                                                    |
| 230387_at       | ---     | ---                                                                                    |
| 232614_at       | ---     | ---                                                                                    |
| 233017_x_at     | ---     | ---                                                                                    |
| 233041_x_at     | ---     | ---                                                                                    |
| 233270_x_at     | ---     | ---                                                                                    |
| 233427_x_at     | ---     | ---                                                                                    |

|             |     |     |
|-------------|-----|-----|
| 234137_s_at | --- | --- |
| 235084_x_at | --- | --- |
| 235757_at   | --- | --- |
| 236170_x_at | --- | --- |
| 236251_at   | --- | --- |
| 236947_at   | --- | --- |
| 237868_x_at | --- | --- |
| 240326_at   | --- | --- |
| 240612_at   | --- | --- |
| 241303_x_at | --- | --- |
| 241956_at   | --- | --- |
| 242235_x_at | --- | --- |
| 242398_x_at | --- | --- |
| 243147_x_at | --- | --- |
| 243931_at   | --- | --- |
| 244384_at   | --- | --- |

**Supplementary Table S2.** 154 common elements of 2533 downregulated transcripts in LCM tumor samples and 3000 upregulated transcripts from 5-Aza-treated HT29 cells.
