# Supplementary material for: Genome-Wide Screening of Genes Regulated by DNA Methylation in Colon Cancer Development
Source: PubMed Central journal article supplement (PMC3462205; doi:10.1371/journal.pone.0046215), 2012-10-01
Supplement: pone.0046215.s007.pdf [file pone.0046215.s007.pdf]

**Supplementary Table S3**

## Putative methylation regulated transcripts downregulated in both adenoma and CRC samples

| Probe Set ID | Gene Symbol                                                                            | Gene Title                                                                                                                                                                                                                                                                                                       |
|--------------|----------------------------------------------------------------------------------------|------------------------------------------------------------------------------------------------------------------------------------------------------------------------------------------------------------------------------------------------------------------------------------------------------------------|
| 222688_at    | ACER3                                                                                  | alkaline ceramidase 3                                                                                                                                                                                                                                                                                            |
| 224667_x_at  | ANAPC16                                                                                | anaphase promoting complex subunit 16                                                                                                                                                                                                                                                                            |
| 202888_s_at  | ANPEP                                                                                  | alanyl (membrane) aminopeptidase                                                                                                                                                                                                                                                                                 |
| 1555962_at   | B3GNT7                                                                                 | UDP-GlcNAc:betaGal beta-1,3-N-acetylglucosaminyltransferase 7                                                                                                                                                                                                                                                    |
| 205263_at    | BCL10                                                                                  | B-cell CLL/lymphoma 10                                                                                                                                                                                                                                                                                           |
| 229520_s_at  | C14orf118                                                                              | chromosome 14 open reading frame 118                                                                                                                                                                                                                                                                             |
| 223484_at    | C15orf48                                                                               | chromosome 15 open reading frame 48                                                                                                                                                                                                                                                                              |
| 224458_at    | C9orf125                                                                               | chromosome 9 open reading frame 125                                                                                                                                                                                                                                                                              |
| 214315_x_at  | CALR                                                                                   | calreticulin                                                                                                                                                                                                                                                                                                     |
| 232266_x_at  | CDK13                                                                                  | Cyclin-dependent kinase 13                                                                                                                                                                                                                                                                                       |
| 204159_at    | CDKN2C                                                                                 | cyclin-dependent kinase inhibitor 2C (p18, inhibits CDK4)                                                                                                                                                                                                                                                        |
| 205709_s_at  | CDS1                                                                                   | CDP-diacylglycerol synthase (phosphatidate cytidyltransferase) 1                                                                                                                                                                                                                                                 |
| 200998_s_at  | CKAP4                                                                                  | cytoskeleton-associated protein 4                                                                                                                                                                                                                                                                                |
| 220026_at    | CLCA4                                                                                  | chloride channel accessory 4                                                                                                                                                                                                                                                                                     |
| 234981_x_at  | CMBL                                                                                   | carboxymethylenebutenolidase homolog (Pseudomonas)                                                                                                                                                                                                                                                               |
| 225009_at    | CMTM4                                                                                  | CKLF-like MARVEL transmembrane domain containing 4                                                                                                                                                                                                                                                               |
| 218900_at    | CNNM4                                                                                  | cyclin M4                                                                                                                                                                                                                                                                                                        |
| 244546_at    | CYCS                                                                                   | cytochrome c, somatic                                                                                                                                                                                                                                                                                            |
| 219290_x_at  | DAPP1                                                                                  | dual adaptor of phosphotyrosine and 3-phosphoinositides                                                                                                                                                                                                                                                          |
| 205370_x_at  | DBT                                                                                    | dihydrolipoamide branched chain transacylase E2                                                                                                                                                                                                                                                                  |
| 242562_at    | DNAJC24                                                                                | DnaJ (Hsp40) homolog, subfamily C, member 24                                                                                                                                                                                                                                                                     |
| 227955_s_at  | EFNA5                                                                                  | ephrin-A5                                                                                                                                                                                                                                                                                                        |
| 242608_x_at  | FAM161B                                                                                | Family with sequence similarity 161, member B                                                                                                                                                                                                                                                                    |
| 226062_x_at  | FAM63A                                                                                 | family with sequence similarity 63, member A                                                                                                                                                                                                                                                                     |
| 201722_s_at  | GALNT1                                                                                 | UDP-N-acetyl-alpha-D-galactosamine:polypeptide N-acetylgalactosaminyltransferase 1 (GalNAc-T1)                                                                                                                                                                                                                   |
| 206422_at    | GCG                                                                                    | glucagon                                                                                                                                                                                                                                                                                                         |
| 212959_s_at  | GNPTAB                                                                                 | N-acetylglucosamine-1-phosphate transferase, alpha and beta subunits                                                                                                                                                                                                                                             |
| 211040_x_at  | GTSE1                                                                                  | G-2 and S-phase expressed 1                                                                                                                                                                                                                                                                                      |
| 220071_x_at  | HAUS2                                                                                  | HAUS augmin-like complex, subunit 2                                                                                                                                                                                                                                                                              |
| 217845_x_at  | HIGD1A                                                                                 | HIG1 hypoxia inducible domain family, member 1A                                                                                                                                                                                                                                                                  |
| 200799_at    | HSPA1A                                                                                 | heat shock 70kDa protein 1A                                                                                                                                                                                                                                                                                      |
| 206502_s_at  | INSM1                                                                                  | insulinoma-associated 1                                                                                                                                                                                                                                                                                          |
| 202746_at    | ITM2A                                                                                  | integral membrane protein 2A                                                                                                                                                                                                                                                                                     |
| 1562063_x_at | KIAA1245 ///<br>LOC200030 ///<br>NBPF1 /// NBPF10<br>/// NBPF11 ///<br>NBPF8 /// NBPF9 | KIAA1245 /// neuroblastoma breakpoint family, member 11-like ///<br>neuroblastoma breakpoint family, member 1 /// neuroblastoma<br>breakpoint family, member 10 /// neuroblastoma breakpoint family,<br>member 11 /// neuroblastoma breakpoint family, member 8 ///<br>neuroblastoma breakpoint family, member 9 |
| 235167_at    | LOC100190986                                                                           | hypothetical LOC100190986                                                                                                                                                                                                                                                                                        |
| 204037_at    | LPAR1                                                                                  | lysophosphatidic acid receptor 1                                                                                                                                                                                                                                                                                 |
| 204674_at    | LRMP                                                                                   | lymphoid-restricted membrane protein                                                                                                                                                                                                                                                                             |
| 220376_at    | LRRC19                                                                                 | leucine rich repeat containing 19                                                                                                                                                                                                                                                                                |
| 211452_x_at  | LRRFIP1                                                                                | leucine rich repeat (in FLII) interacting protein 1                                                                                                                                                                                                                                                              |
| 209579_s_at  | MBD4                                                                                   | methyl-CpG binding domain protein 4                                                                                                                                                                                                                                                                              |
| 217109_at    | MUC4                                                                                   | mucin 4, cell surface associated                                                                                                                                                                                                                                                                                 |

|              |         |                                                                                      |
|--------------|---------|--------------------------------------------------------------------------------------|
| 232169_x_at  | NDUFS8  | NADH dehydrogenase (ubiquinone) Fe-S protein 8, 23kDa (NADH-coenzyme Q reductase)    |
| 201502_s_at  | NFKBIA  | nuclear factor of kappa light polypeptide gene enhancer in B-cells inhibitor, alpha  |
| 239748_x_at  | OCIAD1  | OCIA domain containing 1                                                             |
| 206323_x_at  | OPHN1   | oligophrenin 1                                                                       |
| 1554384_at   | PADI2   | peptidyl arginine deiminase, type II                                                 |
| 242871_at    | PAQR5   | progesterone and adiponectin receptor family member V                                |
| 204687_at    | PARM1   | prostate androgen-regulated mucin-like protein 1                                     |
| 206792_x_at  | PDE4C   | phosphodiesterase 4C, cAMP-specific (phosphodiesterase E1 dunce homolog, Drosophila) |
| 203131_at    | PDGFRA  | platelet-derived growth factor receptor, alpha polypeptide                           |
| 215179_x_at  | PGF     | Placental growth factor                                                              |
| 207109_at    | POU2F3  | POU class 2 homeobox 3                                                               |
| 219392_x_at  | PRR11   | proline rich 11                                                                      |
| 232215_x_at  | PRR11   | proline rich 11                                                                      |
| 238513_at    | PRRG4   | Proline rich Gla (G-carboxyglutamic acid) 4 (transmembrane)                          |
| 215894_at    | PTGDR   | prostaglandin D2 receptor (DP)                                                       |
| 221872_at    | RARRES1 | retinoic acid receptor responder (tazarotene induced) 1                              |
| 215588_x_at  | RIOK3   | RIO kinase 3 (yeast)                                                                 |
| 214041_x_at  | RPL37A  | Ribosomal protein L37a                                                               |
| 33323_r_at   | SFN     | stratifin                                                                            |
| 230375_at    | SFRS18  | splicing factor, arginine/serine-rich 18                                             |
| 218835_at    | SFTPA2  | surfactant protein A2                                                                |
| 213936_x_at  | SFTPB   | surfactant protein B                                                                 |
| 242578_x_at  | SLC22A3 | Solute carrier family 22 (extraneuronal monoamine transporter), member 3             |
| 220796_x_at  | SLC35E1 | solute carrier family 35, member E1                                                  |
| 232739_at    | SPIB    | Spi-B transcription factor (Spi-1/PU.1 related)                                      |
| 202565_s_at  | SVIL    | supervillin                                                                          |
| 236248_x_at  | TADA2B  | transcriptional adaptor 2B                                                           |
| 212761_at    | TCF7L2  | transcription factor 7-like 2 (T-cell specific, HMG-box)                             |
| 229341_at    | TFCP2L1 | transcription factor CP2-like 1                                                      |
| 242377_x_at  | THUMPD3 | THUMP domain containing 3                                                            |
| 205812_s_at  | TMED9   | transmembrane emp24 protein transport domain containing 9                            |
| 240770_at    | TMEM171 | transmembrane protein 171                                                            |
| 219736_at    | TRIM36  | tripartite motif-containing 36                                                       |
| 236715_x_at  | UACA    | uveal autoantigen with coiled-coil domains and ankyrin repeats                       |
| 235327_x_at  | UBXN2A  | UBX domain protein 2A                                                                |
| 207245_at    | UGT2B17 | UDP glucuronosyltransferase 2 family, polypeptide B17                                |
| 233595_at    | USP34   | ubiquitin specific peptidase 34                                                      |
| 218171_at    | VPS4B   | vacuolar protein sorting 4 homolog B (S. cerevisiae)                                 |
| 232516_x_at  | YY1AP1  | YY1 associated protein 1                                                             |
| 233399_x_at  | ZNF252  | Zinc finger protein 252                                                              |
| 208137_x_at  | ZNF611  | zinc finger protein 611                                                              |
| 215978_x_at  | ZNF721  | zinc finger protein 721                                                              |
| 1566887_x_at | ---     | ---                                                                                  |
| 1569409_x_at | ---     | ---                                                                                  |
| 207730_x_at  | ---     | ---                                                                                  |
| 208246_x_at  | ---     | ---                                                                                  |
| 210679_x_at  | ---     | ---                                                                                  |
| 214989_x_at  | ---     | ---                                                                                  |

|             |     |     |
|-------------|-----|-----|
| 215604_x_at | --- | --- |
| 215628_x_at | --- | --- |
| 216147_at   | --- | --- |
| 216187_x_at | --- | --- |
| 217679_x_at | --- | --- |
| 229157_at   | --- | --- |
| 229434_at   | --- | --- |
| 233041_x_at | --- | --- |
| 233427_x_at | --- | --- |
| 235084_x_at | --- | --- |
| 235757_at   | --- | --- |
| 237868_x_at | --- | --- |
| 240612_at   | --- | --- |
| 241303_x_at | --- | --- |
| 242235_x_at | --- | --- |
| 242398_x_at | --- | --- |
| 243147_x_at | --- | --- |
| 243931_at   | --- | --- |
| 244384_at   | --- | --- |

**Supplementary Table S3.** From the 154 methylation related transcripts (listed in Supplementary Table S2.), 108 were also downregulated in adenoma samples. These transcripts were found to be inactivated by DNA methylation at the early phase of carcinogenesis. Supplementary Figure S1 shows the expression pattern of these genes in normal, adenoma and tumor samples.
