# Supplementary material for: Genome-Wide Screening of Genes Regulated by DNA Methylation in Colon Cancer Development
Source: PubMed Central journal article supplement (PMC3462205; doi:10.1371/journal.pone.0046215), 2012-10-01
Supplement: pone.0046215.s008.pdf [file pone.0046215.s008.pdf]

### **Supplementary Table S4**

#### Applied primer sequences

| <b>Affy_ID</b> | <b>Gene symbol</b>  | <b>Forward primer sequence 5'-3'</b> | <b>Reverse primer sequence 5'-3'</b> |
|----------------|---------------------|--------------------------------------|--------------------------------------|
| 242608_x_at    | FAM161B             | GAGCAAGACCCCATCTCAAA                 | CAATCATCCTGTCTCCACAGC                |
| 204674_at      | LRMP                | TGTTTGCAGCTTTGATGAGC                 | TGAGTCCTCTTGCTGTGTGG                 |
| 206422_at      | GCG                 | TCCGATCTGACATATCTGCATT               | CACCACTGTGGCTACCAGTTC                |
| 223484_at      | C15orf48<br>(NMES1) | TGCAGCAATAACTGCACTGTC                | GCTTTGTAAATTTTAAGAAAAACATTC          |
| 236313_at      | CDKN2B              | TTTGAAGGATACATGCAAAACA               | CCACAATGGAGCTAGAAGCA                 |
| 215894_at      | PTGDR               | TTCAGATCTCCAGTATTTTCGGATA            | CACCGGCTCCTGTACCTAAG                 |
|                | PTGDR_regio2        | ATTATTTTTGTGGAAAAGGTAATT             | CCCTAAAAAAAACCAACTCCAATAC            |

**Supplementary Table S4.** The table shows the primer sequences used for RT-PCR validation of mRNA levels of six genes (top) and for bisulphite sequencing on PTGDR promoter region sequence (chr.14: 52734410-52734668) (bottom).
